# Supplementary material for: Effects of supplementary feeding on interspecific dominance hierarchies in garden birds
Source: PLoS One. 2018 Sep 5;13(9):e0202152. doi: 10.1371/journal.pone.0202152 (PMC6124729; doi:10.1371/journal.pone.0202152)
Supplement: S2 Dataset — (CSV) [file pone.0202152.s003.csv]

site	date	time	species	dom_rank	food_type	time_on_feeder_s	n_pecks	interspecific_interaction	winner	loser
A	07/11/2016	am	BT	8.997	hulled	8.16	1	N	NA	NA
A	07/11/2016	am	BT	8.997	unhulled	12.24	3	N	NA	NA
A	07/11/2016	am	BT	8.997	unhulled	2.19	1	N	NA	NA
A	07/11/2016	am	BT	8.997	unhulled	2.11	1	Y	R.	BT
A	07/11/2016	am	BT	8.997	unhulled	4.07	2	N	NA	NA
A	07/11/2016	am	BT	8.997	unhulled	2.03	1	N	NA	NA
A	07/11/2016	am	BT	8.997	unhulled	1.72	1	N	NA	NA
A	07/11/2016	am	BT	8.997	unhulled	3.25	2	Y	HS	BT
A	07/11/2016	am	BT	8.997	unhulled	3.05	2	N	NA	NA
A	07/11/2016	am	BT	8.997	unhulled	1.47	1	N	NA	NA
A	07/11/2016	am	BT	8.997	unhulled	2.93	2	Y	BT	CH
A	07/11/2016	am	BT	8.997	unhulled	1.46	1	N	NA	NA
A	07/11/2016	am	BT	8.997	unhulled	1.44	1	N	NA	NA
A	07/11/2016	am	BT	8.997	unhulled	1.44	1	N	NA	NA
A	07/11/2016	am	BT	8.997	unhulled	1.4	1	N	NA	NA
A	07/11/2016	am	BT	8.997	unhulled	1.35	1	N	NA	NA
A	07/11/2016	am	BT	8.997	unhulled	1.28	1	N	NA	NA
A	07/11/2016	am	BT	8.997	unhulled	1.26	1	N	NA	NA
A	07/11/2016	am	BT	8.997	unhulled	1.25	1	N	NA	NA
A	07/11/2016	am	BT	8.997	unhulled	1.19	1	N	NA	NA
A	07/11/2016	am	BT	8.997	unhulled	1.19	1	Y	BT	R.
A	07/11/2016	am	BT	8.997	unhulled	3.29	3	N	NA	NA
A	07/11/2016	am	BT	8.997	unhulled	3.25	3	N	NA	NA
A	07/11/2016	am	BT	8.997	unhulled	3.19	3	N	NA	NA
A	07/11/2016	am	BT	8.997	unhulled	2.03	2	N	NA	NA
A	07/11/2016	am	BT	8.997	unhulled	14.31	21	Y	GT	BT
A	07/11/2016	am	BT	8.997	unhulled	4	NA	Y	BT	CH
A	07/11/2016	am	BT	8.997	unhulled	2.87	NA	N	NA	NA
A	07/11/2016	am	BT	8.997	unhulled	2.18	NA	N	NA	NA
A	07/11/2016	am	CH	7.974	hulled	23.23	2	N	NA	NA
A	07/11/2016	am	CH	7.974	hulled	5.44	2	N	NA	NA
A	07/11/2016	am	CH	7.974	hulled	4.43	2	N	NA	NA
A	07/11/2016	am	CH	7.974	hulled	1.53	1	N	NA	NA
A	07/11/2016	am	CH	7.974	hulled	4.9	4	N	NA	NA
A	07/11/2016	am	CH	7.974	unhulled	149.07	30	N	NA	NA
A	07/11/2016	am	CH	7.974	unhulled	3.44	1	N	NA	NA
A	07/11/2016	am	CH	7.974	unhulled	9.82	3	N	NA	NA
A	07/11/2016	am	CH	7.974	unhulled	20	7	N	NA	NA
A	07/11/2016	am	CH	7.974	unhulled	2.78	1	N	NA	NA
A	07/11/2016	am	CH	7.974	unhulled	7.21	3	N	NA	NA
A	07/11/2016	am	CH	7.974	unhulled	2.28	1	N	NA	NA
A	07/11/2016	am	CH	7.974	unhulled	1.97	1	N	NA	NA
A	07/11/2016	am	CH	7.974	unhulled	1.96	1	N	NA	NA
A	07/11/2016	am	CH	7.974	unhulled	9.35	5	N	NA	NA
A	07/11/2016	am	CH	7.974	unhulled	1.72	1	N	NA	NA
A	07/11/2016	am	CH	7.974	unhulled	1.67	1	N	NA	NA
A	07/11/2016	am	CH	7.974	unhulled	1.63	1	N	NA	NA
A	07/11/2016	am	CH	7.974	unhulled	1.62	1	N	NA	NA
A	07/11/2016	am	CH	7.974	unhulled	4.21	3	N	NA	NA
A	07/11/2016	am	CH	7.974	unhulled	1.31	1	N	NA	NA
A	07/11/2016	am	CH	7.974	unhulled	2.56	2	N	NA	NA
A	07/11/2016	am	CH	7.974	unhulled	1.25	1	N	NA	NA
A	07/11/2016	am	CH	7.974	unhulled	1.2	1	N	NA	NA
A	07/11/2016	am	CH	7.974	unhulled	1.2	1	N	NA	NA
A	07/11/2016	am	CH	7.974	unhulled	1.14	1	N	NA	NA
A	07/11/2016	am	CH	7.974	unhulled	3.29	3	N	NA	NA
A	07/11/2016	am	CH	7.974	unhulled	1.97	2	N	NA	NA
A	07/11/2016	am	CH	7.974	unhulled	1.74	2	N	NA	NA
A	07/11/2016	am	CH	7.974	unhulled	0.84	1	N	NA	NA
A	07/11/2016	am	CH	7.974	unhulled	1.68	2	Y	CH	R.
A	07/11/2016	am	CH	7.974	unhulled	1.5	2	N	NA	NA
A	07/11/2016	am	CH	7.974	unhulled	NA	NA	Y	HS	CH
A	07/11/2016	am	CH	7.974	unhulled	NA	NA	Y	CH	HS
A	07/11/2016	am	CH	7.974	unhulled	1.35	NA	Y	BT	CH
A	07/11/2016	am	CH	7.974	unhulled	7.31	NA	N	NA	NA
A	07/11/2016	am	CH	7.974	unhulled	6.66	NA	N	NA	NA
A	07/11/2016	am	GT	6.02	hulled	3.84	1	N	NA	NA
A	07/11/2016	am	GT	6.02	hulled	6.22	2	N	NA	NA
A	07/11/2016	am	GT	6.02	hulled	11.75	4	N	NA	NA
A	07/11/2016	am	GT	6.02	hulled	28.3	10	N	NA	NA
A	07/11/2016	am	GT	6.02	hulled	15.28	7	N	NA	NA
A	07/11/2016	am	GT	6.02	hulled	25.72	13	N	NA	NA
A	07/11/2016	am	GT	6.02	hulled	5.85	3	N	NA	NA
A	07/11/2016	am	GT	6.02	hulled	11.66	6	N	NA	NA
A	07/11/2016	am	GT	6.02	hulled	3.6	2	N	NA	NA
A	07/11/2016	am	GT	6.02	hulled	1.72	1	N	NA	NA
A	07/11/2016	am	GT	6.02	hulled	8.34	5	N	NA	NA
A	07/11/2016	am	GT	6.02	hulled	3.03	2	N	NA	NA
A	07/11/2016	am	GT	6.02	hulled	10.64	8	N	NA	NA
A	07/11/2016	am	GT	6.02	hulled	2.44	2	N	NA	NA
A	07/11/2016	am	GT	6.02	hulled	1.22	1	N	NA	NA
A	07/11/2016	am	GT	6.02	hulled	2.37	2	N	NA	NA
A	07/11/2016	am	GT	6.02	hulled	1.08	1	N	NA	NA
A	07/11/2016	am	GT	6.02	hulled	1.07	1	N	NA	NA
A	07/11/2016	am	GT	6.02	hulled	1.81	2	N	NA	NA
A	07/11/2016	am	GT	6.02	hulled	NA	NA	Y	GT	HS
A	07/11/2016	am	GT	6.02	hulled	11.93	NA	N	NA	NA
A	07/11/2016	am	GT	6.02	unhulled	4.6	2	N	NA	NA
A	07/11/2016	am	GT	6.02	unhulled	2.12	1	N	NA	NA
A	07/11/2016	am	GT	6.02	unhulled	1.9	1	N	NA	NA
A	07/11/2016	am	GT	6.02	unhulled	1.6	1	N	NA	NA
A	07/11/2016	am	GT	6.02	unhulled	2.94	2	N	NA	NA
A	07/11/2016	am	GT	6.02	unhulled	2.91	2	N	NA	NA
A	07/11/2016	am	GT	6.02	unhulled	2.72	2	N	NA	NA
A	07/11/2016	am	GT	6.02	unhulled	1.28	1	N	NA	NA
A	07/11/2016	am	GT	6.02	unhulled	1	1	Y	GT	BT
A	07/11/2016	am	HS	1.044	hulled	268	4	N	NA	NA
A	07/11/2016	am	HS	1.044	hulled	25.92	3	N	NA	NA
A	07/11/2016	am	HS	1.044	hulled	13.15	3	N	NA	NA
A	07/11/2016	am	HS	1.044	hulled	4.07	2	N	NA	NA
A	07/11/2016	am	HS	1.044	hulled	1.88	1	Y	GT	HS
A	07/11/2016	am	HS	1.044	hulled	1.59	2	N	NA	NA
A	07/11/2016	am	HS	1.044	hulled	241.04	NA	N	NA	NA
A	07/11/2016	am	HS	1.044	hulled	22.31	NA	N	NA	NA
A	07/11/2016	am	HS	1.044	hulled	162.24	NA	N	NA	NA
A	07/11/2016	am	HS	1.044	unhulled	29	2	Y	CH	HS
A	07/11/2016	am	HS	1.044	unhulled	20.5	4	N	NA	NA
A	07/11/2016	am	HS	1.044	unhulled	10.01	2	N	NA	NA
A	07/11/2016	am	HS	1.044	unhulled	11.93	3	N	NA	NA
A	07/11/2016	am	HS	1.044	unhulled	3.66	1	N	NA	NA
A	07/11/2016	am	HS	1.044	unhulled	3.41	1	N	NA	NA
A	07/11/2016	am	HS	1.044	unhulled	34.31	12	N	NA	NA
A	07/11/2016	am	HS	1.044	unhulled	5.35	2	N	NA	NA
A	07/11/2016	am	HS	1.044	unhulled	4.59	2	Y	BT	HS
A	07/11/2016	am	HS	1.044	unhulled	23.25	11	Y	HS	R.
A	07/11/2016	am	HS	1.044	unhulled	2	1	Y	CH	HS
A	07/11/2016	am	HS	1.044	unhulled	3.89	2	N	NA	NA
A	07/11/2016	am	HS	1.044	unhulled	15.84	9	N	NA	NA
A	07/11/2016	am	HS	1.044	unhulled	66.21	38	N	NA	NA
A	07/11/2016	am	HS	1.044	unhulled	12.62	8	N	NA	NA
A	07/11/2016	am	HS	1.044	unhulled	9.33	6	N	NA	NA
A	07/11/2016	am	HS	1.044	unhulled	15.5	10	N	NA	NA
A	07/11/2016	am	HS	1.044	unhulled	3.09	2	N	NA	NA
A	07/11/2016	am	HS	1.044	unhulled	1.44	1	N	NA	NA
A	07/11/2016	am	HS	1.044	unhulled	1.13	1	N	NA	NA
A	07/11/2016	am	HS	1.044	unhulled	10.56	15	N	NA	NA
A	07/11/2016	am	HS	1.044	unhulled	9.53	21	N	NA	NA
A	07/11/2016	am	HS	1.044	unhulled	1.66	6	N	NA	NA
A	07/11/2016	am	HS	1.044	unhulled	NA	NA	Y	HS	CH
A	07/11/2016	am	HS	1.044	unhulled	60.01	NA	N	NA	NA
A	07/11/2016	am	HS	1.044	unhulled	12.96	NA	N	NA	NA
A	07/11/2016	am	HS	1.044	unhulled	16.06	NA	N	NA	NA
A	07/11/2016	am	HS	1.044	unhulled	8.16	NA	N	NA	NA
A	07/11/2016	am	R.	3.942	hulled	3.65	2	N	NA	NA
A	07/11/2016	am	R.	3.942	unhulled	4.62	2	N	NA	NA
A	07/11/2016	am	R.	3.942	unhulled	1.79	1	N	NA	NA
A	07/11/2016	am	R.	3.942	unhulled	1.7	NA	Y	CH	R.
A	07/11/2016	pm	BT	8.997	hulled	0.91	0	N	NA	NA
A	07/11/2016	pm	BT	8.997	hulled	14.22	5	N	NA	NA
A	07/11/2016	pm	BT	8.997	hulled	5.57	2	N	NA	NA
A	07/11/2016	pm	BT	8.997	hulled	2.33	1	N	NA	NA
A	07/11/2016	pm	BT	8.997	hulled	4.53	2	N	NA	NA
A	07/11/2016	pm	BT	8.997	hulled	2	1	N	NA	NA
A	07/11/2016	pm	BT	8.997	hulled	5.22	3	N	NA	NA
A	07/11/2016	pm	BT	8.997	hulled	3.38	2	N	NA	NA
A	07/11/2016	pm	BT	8.997	hulled	7.87	5	N	NA	NA
A	07/11/2016	pm	BT	8.997	hulled	1.47	1	N	NA	NA
A	07/11/2016	pm	BT	8.997	hulled	5.75	4	N	NA	NA
A	07/11/2016	pm	BT	8.997	hulled	10.69	8	N	NA	NA
A	07/11/2016	pm	BT	8.997	hulled	3.97	3	N	NA	NA
A	07/11/2016	pm	BT	8.997	hulled	11.75	11	N	NA	NA
A	07/11/2016	pm	BT	8.997	hulled	1.82	2	N	NA	NA
A	07/11/2016	pm	BT	8.997	hulled	0.91	1	N	NA	NA
A	07/11/2016	pm	BT	8.997	hulled	15.19	NA	N	NA	NA
A	07/11/2016	pm	BT	8.997	hulled	9.31	NA	N	NA	NA
A	07/11/2016	pm	BT	8.997	hulled	6.75	NA	N	NA	NA
A	07/11/2016	pm	BT	8.997	hulled	4.31	NA	N	NA	NA
A	07/11/2016	pm	BT	8.997	hulled	4.06	NA	N	NA	NA
A	07/11/2016	pm	BT	8.997	hulled	2.84	NA	N	NA	NA
A	07/11/2016	pm	BT	8.997	hulled	2.57	NA	N	NA	NA
A	07/11/2016	pm	BT	8.997	hulled	48.38	NA	N	NA	NA
A	07/11/2016	pm	BT	8.997	unhulled	4.94	3	N	NA	NA
A	07/11/2016	pm	BT	8.997	unhulled	2.66	1	N	NA	NA
A	07/11/2016	pm	BT	8.997	unhulled	2	1	N	NA	NA
A	07/11/2016	pm	BT	8.997	unhulled	2	1	N	NA	NA
A	07/11/2016	pm	BT	8.997	unhulled	1.75	1	N	NA	NA
A	07/11/2016	pm	BT	8.997	unhulled	1.65	1	N	NA	NA
A	07/11/2016	pm	BT	8.997	unhulled	2.81	2	N	NA	NA
A	07/11/2016	pm	BT	8.997	unhulled	2.57	2	N	NA	NA
A	07/11/2016	pm	BT	8.997	unhulled	2.53	2	N	NA	NA
A	07/11/2016	pm	BT	8.997	unhulled	1.25	1	N	NA	NA
A	07/11/2016	pm	BT	8.997	unhulled	2.22	2	N	NA	NA
A	07/11/2016	pm	BT	8.997	unhulled	1.07	1	N	NA	NA
A	07/11/2016	pm	BT	8.997	unhulled	1	1	N	NA	NA
A	07/11/2016	pm	BT	8.997	unhulled	1.72	2	N	NA	NA
A	07/11/2016	pm	BT	8.997	unhulled	0.72	1	N	NA	NA
A	07/11/2016	pm	BT	8.997	unhulled	0.72	1	N	NA	NA
A	07/11/2016	pm	BT	8.997	unhulled	1.07	NA	N	NA	NA
A	07/11/2016	pm	CH	7.974	hulled	1.57	1	N	NA	NA
A	07/11/2016	pm	CH	7.974	hulled	12.28	8	N	NA	NA
A	07/11/2016	pm	CH	7.974	hulled	1.43	1	N	NA	NA
A	07/11/2016	pm	CH	7.974	hulled	2.66	2	N	NA	NA
A	07/11/2016	pm	CH	7.974	hulled	1.18	1	N	NA	NA
A	07/11/2016	pm	CH	7.974	hulled	7.71	8	N	NA	NA
A	07/11/2016	pm	CH	7.974	hulled	0.81	1	N	NA	NA
A	07/11/2016	pm	CH	7.974	hulled	11.19	NA	N	NA	NA
A	07/11/2016	pm	CH	7.974	hulled	5.59	NA	N	NA	NA
A	07/11/2016	pm	CH	7.974	hulled	5.22	NA	N	NA	NA
A	07/11/2016	pm	CH	7.974	hulled	4.09	NA	N	NA	NA
A	07/11/2016	pm	CH	7.974	hulled	1.19	NA	N	NA	NA
A	07/11/2016	pm	CH	7.974	unhulled	25.5	2	Y	GR	CH
A	07/11/2016	pm	CH	7.974	unhulled	14.81	3	N	NA	NA
A	07/11/2016	pm	CH	7.974	unhulled	3.81	1	N	NA	NA
A	07/11/2016	pm	CH	7.974	unhulled	11.38	4	N	NA	NA
A	07/11/2016	pm	CH	7.974	unhulled	1.87	1	N	NA	NA
A	07/11/2016	pm	CH	7.974	unhulled	3.37	2	N	NA	NA
A	07/11/2016	pm	CH	7.974	unhulled	1.5	1	N	NA	NA
A	07/11/2016	pm	CH	7.974	unhulled	1.37	1	N	NA	NA
A	07/11/2016	pm	CH	7.974	unhulled	1.09	1	N	NA	NA
A	07/11/2016	pm	CH	7.974	unhulled	1.06	1	N	NA	NA
A	07/11/2016	pm	CH	7.974	unhulled	1.06	1	N	NA	NA
A	07/11/2016	pm	CH	7.974	unhulled	1.04	1	N	NA	NA
A	07/11/2016	pm	CH	7.974	unhulled	1.02	1	N	NA	NA
A	07/11/2016	pm	CH	7.974	unhulled	0.97	1	Y	GR	CH
A	07/11/2016	pm	CH	7.974	unhulled	0.69	1	N	NA	NA
A	07/11/2016	pm	CH	7.974	unhulled	0.62	1	N	NA	NA
A	07/11/2016	pm	CH	7.974	unhulled	0.53	1	N	NA	NA
A	07/11/2016	pm	CH	7.974	unhulled	0.46	1	N	NA	NA
A	07/11/2016	pm	CH	7.974	unhulled	0.41	1	N	NA	NA
A	07/11/2016	pm	CH	7.974	unhulled	0.34	1	N	NA	NA
A	07/11/2016	pm	CH	7.974	unhulled	24.68	NA	Y	HS	CH
A	07/11/2016	pm	CH	7.974	unhulled	8.41	NA	N	NA	NA
A	07/11/2016	pm	D.	6.533	hulled	11.5	7	N	NA	NA
A	07/11/2016	pm	D.	6.533	unhulled	2.21	2	N	NA	NA
A	07/11/2016	pm	D.	6.533	unhulled	3.78	4	N	NA	NA
A	07/11/2016	pm	D.	6.533	unhulled	2.16	4	N	NA	NA
A	07/11/2016	pm	GT	6.02	hulled	5.14	2	N	NA	NA
A	07/11/2016	pm	GT	6.02	hulled	6.35	3	N	NA	NA
A	07/11/2016	pm	GT	6.02	hulled	2.07	1	N	NA	NA
A	07/11/2016	pm	GT	6.02	hulled	1.59	1	N	NA	NA
A	07/11/2016	pm	GT	6.02	hulled	15	10	N	NA	NA
A	07/11/2016	pm	GT	6.02	hulled	1.41	1	N	NA	NA
A	07/11/2016	pm	GT	6.02	hulled	2.71	2	N	NA	NA
A	07/11/2016	pm	GT	6.02	hulled	12.46	10	N	NA	NA
A	07/11/2016	pm	GT	6.02	hulled	8.55	7	N	NA	NA
A	07/11/2016	pm	GT	6.02	hulled	6	5	N	NA	NA
A	07/11/2016	pm	GT	6.02	hulled	2.17	2	N	NA	NA
A	07/11/2016	pm	GT	6.02	hulled	5.28	5	N	NA	NA
A	07/11/2016	pm	GT	6.02	hulled	4.47	5	N	NA	NA
A	07/11/2016	pm	GT	6.02	hulled	NA	NA	N	NA	NA
A	07/11/2016	pm	GT	6.02	hulled	1.04	NA	N	NA	NA
A	07/11/2016	pm	GT	6.02	hulled	5.19	NA	N	NA	NA
A	07/11/2016	pm	GT	6.02	hulled	1.72	NA	N	NA	NA
A	07/11/2016	pm	GT	6.02	unhulled	39.04	1	N	NA	NA
A	07/11/2016	pm	GT	6.02	unhulled	3.3	1	N	NA	NA
A	07/11/2016	pm	GT	6.02	unhulled	3.34	2	N	NA	NA
A	07/11/2016	pm	GT	6.02	unhulled	1.62	1	N	NA	NA
A	07/11/2016	pm	GT	6.02	unhulled	1.41	1	N	NA	NA
A	07/11/2016	pm	GT	6.02	unhulled	1.28	1	N	NA	NA
A	07/11/2016	pm	GT	6.02	unhulled	1.13	1	N	NA	NA
A	07/11/2016	pm	GT	6.02	unhulled	1.07	1	N	NA	NA
A	07/11/2016	pm	GT	6.02	unhulled	2.04	2	N	NA	NA
A	07/11/2016	pm	GT	6.02	unhulled	4.05	4	N	NA	NA
A	07/11/2016	pm	GT	6.02	unhulled	1.81	2	N	NA	NA
A	07/11/2016	pm	GT	6.02	unhulled	0.66	1	N	NA	NA
A	07/11/2016	pm	GT	6.02	unhulled	1.22	2	N	NA	NA
A	07/11/2016	pm	GT	6.02	unhulled	0.5	1	N	NA	NA
A	07/11/2016	pm	GT	6.02	unhulled	2.52	NA	N	NA	NA
A	07/11/2016	pm	GT	6.02	unhulled	1.81	NA	N	NA	NA
A	07/11/2016	pm	GR	2.115	hulled	17.71	8	N	NA	NA
A	07/11/2016	pm	GR	2.115	hulled	87.56	40	N	NA	NA
A	07/11/2016	pm	GR	2.115	hulled	5.35	NA	Y	CH	GR
A	07/11/2016	pm	GR	2.115	unhulled	18.03	5	Y	HS	GR
A	07/11/2016	pm	GR	2.115	unhulled	58.6	52	N	NA	NA
A	07/11/2016	pm	GR	2.115	unhulled	24.12	NA	Y	HS	GR
A	07/11/2016	pm	GR	2.115	unhulled	22.56	NA	Y	HS	GR
A	07/11/2016	pm	GR	2.115	unhulled	63.47	NA	N	NA	NA
A	07/11/2016	pm	HS	1.044	unhulled	26.68	6	N	NA	NA
A	07/11/2016	pm	HS	1.044	unhulled	4.22	4	N	NA	NA
A	07/11/2016	pm	HS	1.044	unhulled	22.94	NA	N	NA	NA
A	07/11/2016	pm	HS	1.044	unhulled	11.14	NA	N	NA	NA
A	07/11/2016	pm	HS	1.044	unhulled	8.87	NA	N	NA	NA
A	07/11/2016	pm	HS	1.044	unhulled	7.53	NA	N	NA	NA
A	07/11/2016	pm	HS	1.044	unhulled	15.35	NA	N	NA	NA
A	07/11/2016	pm	R.	3.942	unhulled	1.29	1	N	NA	NA
A	07/11/2016	pm	R.	3.942	unhulled	0.63	2	N	NA	NA
B	08/11/2016	pm	BT	8.997	hulled	3.9	2	N	NA	NA
B	08/11/2016	pm	BT	8.997	hulled	3.6	2	Y	GT	BT
B	08/11/2016	pm	BT	8.997	hulled	3.4	2	N	NA	NA
B	08/11/2016	pm	BT	8.997	hulled	2.96	2	N	NA	NA
B	08/11/2016	pm	BT	8.997	hulled	1.25	1	N	NA	NA
B	08/11/2016	pm	BT	8.997	hulled	1.19	1	Y	GT	BT
B	08/11/2016	pm	BT	8.997	hulled	0.94	1	N	NA	NA
B	08/11/2016	pm	BT	8.997	hulled	1.75	2	N	NA	NA
B	08/11/2016	pm	BT	8.997	hulled	0.69	1	Y	GT	BT
B	08/11/2016	pm	BT	8.997	hulled	4.75	NA	Y	GT	BT
B	08/11/2016	pm	BT	8.997	hulled	6.34	NA	N	NA	NA
B	08/11/2016	pm	BT	8.997	hulled	4.84	NA	N	NA	NA
B	08/11/2016	pm	BT	8.997	hulled	2.03	NA	N	NA	NA
B	08/11/2016	pm	BT	8.997	unhulled	6.15	3	N	NA	NA
B	08/11/2016	pm	BT	8.997	unhulled	1.41	1	N	NA	NA
B	08/11/2016	pm	BT	8.997	unhulled	1.09	1	N	NA	NA
B	08/11/2016	pm	BT	8.997	unhulled	1.09	1	N	NA	NA
B	08/11/2016	pm	BT	8.997	unhulled	0.98	1	N	NA	NA
B	08/11/2016	pm	BT	8.997	unhulled	0.75	1	N	NA	NA
B	08/11/2016	pm	BT	8.997	unhulled	0.85	NA	N	NA	NA
B	08/11/2016	pm	CH	7.974	unhulled	17.21	1	N	NA	NA
B	08/11/2016	pm	CH	7.974	unhulled	9.59	3	N	NA	NA
B	08/11/2016	pm	CH	7.974	unhulled	1.59	1	N	NA	NA
B	08/11/2016	pm	CH	7.974	unhulled	1.57	1	N	NA	NA
B	08/11/2016	pm	CH	7.974	unhulled	1.53	1	N	NA	NA
B	08/11/2016	pm	CH	7.974	unhulled	1.5	1	N	NA	NA
B	08/11/2016	pm	CH	7.974	unhulled	4.22	3	N	NA	NA
B	08/11/2016	pm	CH	7.974	unhulled	6.94	5	N	NA	NA
B	08/11/2016	pm	CH	7.974	unhulled	2.44	2	N	NA	NA
B	08/11/2016	pm	CH	7.974	unhulled	3.62	3	N	NA	NA
B	08/11/2016	pm	CH	7.974	unhulled	1.2	1	N	NA	NA
B	08/11/2016	pm	CH	7.974	unhulled	1.19	1	N	NA	NA
B	08/11/2016	pm	CH	7.974	unhulled	1.05	1	N	NA	NA
B	08/11/2016	pm	CH	7.974	unhulled	1.05	1	N	NA	NA
B	08/11/2016	pm	CH	7.974	unhulled	0.92	1	N	NA	NA
B	08/11/2016	pm	CH	7.974	unhulled	2.72	3	N	NA	NA
B	08/11/2016	pm	CH	7.974	unhulled	0.53	1	N	NA	NA
B	08/11/2016	pm	CH	7.974	unhulled	3.65	7	Y	GT	CH
B	08/11/2016	pm	CH	7.974	unhulled	0.46	1	N	NA	NA
B	08/11/2016	pm	CH	7.974	unhulled	1.75	4	N	NA	NA
B	08/11/2016	pm	CH	7.974	unhulled	0.75	2	N	NA	NA
B	08/11/2016	pm	CH	7.974	unhulled	NA	NA	N	NA	NA
B	08/11/2016	pm	CH	7.974	unhulled	NA	NA	N	NA	NA
B	08/11/2016	pm	CH	7.974	unhulled	3.56	NA	N	NA	NA
B	08/11/2016	pm	GO	5.377	unhulled	38.65	7	Y	R.	GO
B	08/11/2016	pm	GT	6.02	hulled	1.16	0	N	NA	NA
B	08/11/2016	pm	GT	6.02	hulled	24.39	4	N	NA	NA
B	08/11/2016	pm	GT	6.02	hulled	20.75	5	N	NA	NA
B	08/11/2016	pm	GT	6.02	hulled	2.72	2	N	NA	NA
B	08/11/2016	pm	GT	6.02	hulled	2.36	2	Y	GT	BT
B	08/11/2016	pm	GT	6.02	hulled	5.53	5	N	NA	NA
B	08/11/2016	pm	GT	6.02	hulled	6.28	6	N	NA	NA
B	08/11/2016	pm	GT	6.02	hulled	1.04	1	N	NA	NA
B	08/11/2016	pm	GT	6.02	hulled	3.72	4	N	NA	NA
B	08/11/2016	pm	GT	6.02	hulled	2.59	3	N	NA	NA
B	08/11/2016	pm	GT	6.02	hulled	1.52	2	N	NA	NA
B	08/11/2016	pm	GT	6.02	hulled	2.21	3	N	NA	NA
B	08/11/2016	pm	GT	6.02	hulled	1.37	2	N	NA	NA
B	08/11/2016	pm	GT	6.02	hulled	2.06	NA	Y	GT	BT
B	08/11/2016	pm	GT	6.02	hulled	16.63	NA	N	NA	NA
B	08/11/2016	pm	GT	6.02	hulled	8.47	NA	N	NA	NA
B	08/11/2016	pm	GT	6.02	hulled	7.81	NA	N	NA	NA
B	08/11/2016	pm	GT	6.02	hulled	4.16	NA	N	NA	NA
B	08/11/2016	pm	GT	6.02	hulled	3.87	NA	N	NA	NA
B	08/11/2016	pm	GT	6.02	unhulled	NA	NA	N	NA	NA
B	08/11/2016	pm	GT	6.02	unhulled	3.25	2	N	NA	NA
B	08/11/2016	pm	GT	6.02	unhulled	3.82	3	N	NA	NA
B	08/11/2016	pm	GT	6.02	unhulled	2.53	2	N	NA	NA
B	08/11/2016	pm	GT	6.02	unhulled	0.37	1	N	NA	NA
B	08/11/2016	pm	GR	2.115	unhulled	129.84	NA	Y	GR	CH
B	08/11/2016	pm	R.	3.942	unhulled	NA	NA	N	NA	NA
B	08/11/2016	pm	R.	3.942	unhulled	28.45	4	Y	CH	R.
B	08/11/2016	pm	R.	3.942	unhulled	1.35	1	N	NA	NA
B	08/11/2016	pm	R.	3.942	unhulled	3.31	NA	N	NA	NA
A	09/11/2016	pm	BT	8.997	hulled	4.8	2	N	NA	NA
A	09/11/2016	pm	BT	8.997	hulled	7.47	4	N	NA	NA
A	09/11/2016	pm	BT	8.997	hulled	3.42	2	N	NA	NA
A	09/11/2016	pm	BT	8.997	hulled	6.4	5	N	NA	NA
A	09/11/2016	pm	BT	8.997	hulled	3.59	4	N	NA	NA
A	09/11/2016	pm	BT	8.997	hulled	5.93	7	N	NA	NA
A	09/11/2016	pm	BT	8.997	hulled	7.78	NA	N	NA	NA
A	09/11/2016	pm	BT	8.997	hulled	4.74	NA	N	NA	NA
A	09/11/2016	pm	BT	8.997	hulled	4.47	NA	N	NA	NA
A	09/11/2016	pm	BT	8.997	hulled	2.89	NA	N	NA	NA
A	09/11/2016	pm	BT	8.997	hulled	19.67	NA	N	NA	NA
A	09/11/2016	pm	BT	8.997	unhulled	7.19	3	N	NA	NA
A	09/11/2016	pm	BT	8.997	unhulled	2.24	1	N	NA	NA
A	09/11/2016	pm	BT	8.997	unhulled	3.8	2	N	NA	NA
A	09/11/2016	pm	BT	8.997	unhulled	3.6	2	N	NA	NA
A	09/11/2016	pm	BT	8.997	unhulled	1.73	1	N	NA	NA
A	09/11/2016	pm	BT	8.997	unhulled	1.62	1	N	NA	NA
A	09/11/2016	pm	BT	8.997	unhulled	1.54	1	N	NA	NA
A	09/11/2016	pm	BT	8.997	unhulled	1.53	1	N	NA	NA
A	09/11/2016	pm	BT	8.997	unhulled	1.5	1	N	NA	NA
A	09/11/2016	pm	BT	8.997	unhulled	2.97	2	N	NA	NA
A	09/11/2016	pm	BT	8.997	unhulled	4.31	3	N	NA	NA
A	09/11/2016	pm	BT	8.997	unhulled	1.42	1	N	NA	NA
A	09/11/2016	pm	BT	8.997	unhulled	1.34	1	N	NA	NA
A	09/11/2016	pm	BT	8.997	unhulled	3.95	3	N	NA	NA
A	09/11/2016	pm	BT	8.997	unhulled	2.02	2	N	NA	NA
A	09/11/2016	pm	BT	8.997	unhulled	2.8	3	N	NA	NA
A	09/11/2016	pm	BT	8.997	unhulled	4.18	6	N	NA	NA
A	09/11/2016	pm	BT	8.997	unhulled	1.17	2	N	NA	NA
A	09/11/2016	pm	BT	8.997	unhulled	NA	NA	Y	CH	BT
A	09/11/2016	pm	BT	8.997	unhulled	NA	NA	Y	HS	BT
A	09/11/2016	pm	BT	8.997	unhulled	NA	NA	N	NA	NA
A	09/11/2016	pm	BT	8.997	unhulled	NA	NA	N	NA	NA
A	09/11/2016	pm	BT	8.997	unhulled	NA	NA	N	NA	NA
A	09/11/2016	pm	BT	8.997	unhulled	2.5	NA	N	NA	NA
A	09/11/2016	pm	BT	8.997	unhulled	4.43	NA	Y	GT	BT
A	09/11/2016	pm	BT	8.997	unhulled	21.79	NA	N	NA	NA
A	09/11/2016	pm	BT	8.997	unhulled	5.51	NA	N	NA	NA
A	09/11/2016	pm	BT	8.997	unhulled	5.1	NA	N	NA	NA
A	09/11/2016	pm	BT	8.997	unhulled	4.06	NA	N	NA	NA
A	09/11/2016	pm	BT	8.997	unhulled	4	NA	N	NA	NA
A	09/11/2016	pm	BT	8.997	unhulled	3.53	NA	N	NA	NA
A	09/11/2016	pm	BT	8.997	unhulled	3.42	NA	N	NA	NA
A	09/11/2016	pm	BT	8.997	unhulled	3.34	NA	N	NA	NA
A	09/11/2016	pm	BT	8.997	unhulled	3.33	NA	N	NA	NA
A	09/11/2016	pm	BT	8.997	unhulled	3.16	NA	N	NA	NA
A	09/11/2016	pm	BT	8.997	unhulled	3.14	NA	N	NA	NA
A	09/11/2016	pm	BT	8.997	unhulled	3.02	NA	N	NA	NA
A	09/11/2016	pm	BT	8.997	unhulled	2.8	NA	N	NA	NA
A	09/11/2016	pm	BT	8.997	unhulled	2.65	NA	N	NA	NA
A	09/11/2016	pm	BT	8.997	unhulled	2.32	NA	N	NA	NA
A	09/11/2016	pm	BT	8.997	unhulled	2.27	NA	N	NA	NA
A	09/11/2016	pm	BT	8.997	unhulled	2.1	NA	N	NA	NA
A	09/11/2016	pm	BT	8.997	unhulled	1.94	NA	N	NA	NA
A	09/11/2016	pm	BT	8.997	unhulled	7.4	NA	N	NA	NA
A	09/11/2016	pm	BT	8.997	unhulled	6.69	NA	N	NA	NA
A	09/11/2016	pm	BT	8.997	unhulled	5.06	NA	N	NA	NA
A	09/11/2016	pm	CH	7.974	unhulled	2.4	1	N	NA	NA
A	09/11/2016	pm	CH	7.974	unhulled	2.39	1	N	NA	NA
A	09/11/2016	pm	CH	7.974	unhulled	17.15	9	N	NA	NA
A	09/11/2016	pm	CH	7.974	unhulled	7.2	5	N	NA	NA
A	09/11/2016	pm	CH	7.974	unhulled	6.41	5	N	NA	NA
A	09/11/2016	pm	CH	7.974	unhulled	NA	NA	Y	CH	BT
A	09/11/2016	pm	CH	7.974	unhulled	NA	NA	N	NA	NA
A	09/11/2016	pm	CH	7.974	unhulled	NA	NA	N	NA	NA
A	09/11/2016	pm	CH	7.974	unhulled	8.57	NA	Y	CH	BT
A	09/11/2016	pm	CH	7.974	unhulled	10.61	NA	N	NA	NA
A	09/11/2016	pm	CH	7.974	unhulled	4.21	NA	N	NA	NA
A	09/11/2016	pm	CH	7.974	unhulled	3.42	NA	N	NA	NA
A	09/11/2016	pm	CH	7.974	unhulled	3.2	NA	N	NA	NA
A	09/11/2016	pm	CH	7.974	unhulled	2.42	NA	N	NA	NA
A	09/11/2016	pm	CH	7.974	unhulled	2.38	NA	N	NA	NA
A	09/11/2016	pm	CH	7.974	unhulled	39.97	NA	N	NA	NA
A	09/11/2016	pm	CH	7.974	unhulled	21.17	NA	N	NA	NA
A	09/11/2016	pm	CH	7.974	unhulled	20.09	NA	N	NA	NA
A	09/11/2016	pm	CH	7.974	unhulled	7.32	NA	N	NA	NA
A	09/11/2016	pm	CH	7.974	unhulled	6.44	NA	N	NA	NA
A	09/11/2016	pm	CH	7.974	unhulled	5.89	NA	N	NA	NA
A	09/11/2016	pm	CH	7.974	unhulled	2.7	NA	N	NA	NA
A	09/11/2016	pm	GT	6.02	hulled	15.63	5	N	NA	NA
A	09/11/2016	pm	GT	6.02	hulled	7.5	6	N	NA	NA
A	09/11/2016	pm	GT	6.02	hulled	3.1	5	N	NA	NA
A	09/11/2016	pm	GT	6.02	hulled	9.8	NA	N	NA	NA
A	09/11/2016	pm	GT	6.02	hulled	4.3	NA	N	NA	NA
A	09/11/2016	pm	GT	6.02	unhulled	1.59	1	N	NA	NA
A	09/11/2016	pm	GT	6.02	unhulled	3	2	N	NA	NA
A	09/11/2016	pm	GT	6.02	unhulled	1.2	1	N	NA	NA
A	09/11/2016	pm	GT	6.02	unhulled	2.21	2	N	NA	NA
A	09/11/2016	pm	GT	6.02	unhulled	3.1	4	N	NA	NA
A	09/11/2016	pm	GT	6.02	unhulled	NA	NA	Y	GT	BT
A	09/11/2016	pm	GT	6.02	unhulled	NA	NA	Y	GT	CH
A	09/11/2016	pm	GT	6.02	unhulled	NA	NA	N	NA	NA
A	09/11/2016	pm	GT	6.02	unhulled	5.01	NA	N	NA	NA
A	09/11/2016	pm	GT	6.02	unhulled	4.9	NA	N	NA	NA
A	09/11/2016	pm	GT	6.02	unhulled	3.7	NA	N	NA	NA
A	09/11/2016	pm	GT	6.02	unhulled	2.68	NA	N	NA	NA
A	09/11/2016	pm	GT	6.02	unhulled	2.5	NA	N	NA	NA
A	09/11/2016	pm	GT	6.02	unhulled	2.02	NA	N	NA	NA
A	09/11/2016	pm	HS	1.044	hulled	14.14	NA	N	NA	NA
A	09/11/2016	pm	HS	1.044	unhulled	17.26	6	Y	HS	BT
A	09/11/2016	pm	HS	1.044	unhulled	1.51	1	N	NA	NA
A	09/11/2016	pm	HS	1.044	unhulled	1.48	1	N	NA	NA
A	09/11/2016	pm	HS	1.044	unhulled	5.63	5	N	NA	NA
A	09/11/2016	pm	HS	1.044	unhulled	15.48	19	N	NA	NA
A	09/11/2016	pm	HS	1.044	unhulled	NA	NA	N	NA	NA
A	09/11/2016	pm	HS	1.044	unhulled	18.43	NA	Y	BT	HS
A	09/11/2016	pm	HS	1.044	unhulled	6.4	NA	N	NA	NA
A	09/11/2016	pm	HS	1.044	unhulled	5.3	NA	N	NA	NA
A	09/11/2016	pm	HS	1.044	unhulled	5.2	NA	N	NA	NA
A	09/11/2016	pm	HS	1.044	unhulled	20.04	NA	N	NA	NA
A	09/11/2016	pm	HS	1.044	unhulled	15.47	NA	N	NA	NA
A	09/11/2016	pm	HS	1.044	unhulled	6.09	NA	N	NA	NA
A	09/11/2016	pm	HS	1.044	unhulled	2.9	NA	N	NA	NA
A	09/11/2016	pm	R.	3.942	unhulled	1.73	1	N	NA	NA
A	09/11/2016	pm	R.	3.942	unhulled	15.81	19	N	NA	NA
A	09/11/2016	pm	R.	3.942	unhulled	3.88	6	N	NA	NA
A	09/11/2016	pm	R.	3.942	unhulled	6.99	11	N	NA	NA
A	09/11/2016	pm	R.	3.942	unhulled	3.38	NA	N	NA	NA
B	10/11/2016	am	BT	8.997	hulled	2.96	1	N	NA	NA
B	10/11/2016	am	BT	8.997	hulled	5.56	3	N	NA	NA
B	10/11/2016	am	BT	8.997	hulled	1.23	1	N	NA	NA
B	10/11/2016	am	BT	8.997	hulled	0.88	1	N	NA	NA
B	10/11/2016	am	BT	8.997	hulled	0.67	1	N	NA	NA
B	10/11/2016	am	BT	8.997	hulled	0.63	1	N	NA	NA
B	10/11/2016	am	BT	8.997	hulled	NA	NA	N	NA	NA
B	10/11/2016	am	BT	8.997	unhulled	2.36	1	N	NA	NA
B	10/11/2016	am	BT	8.997	unhulled	1.94	1	N	NA	NA
B	10/11/2016	am	BT	8.997	unhulled	1.43	1	N	NA	NA
B	10/11/2016	am	BT	8.997	unhulled	1.41	1	N	NA	NA
B	10/11/2016	am	BT	8.997	unhulled	2.01	2	N	NA	NA
B	10/11/2016	am	BT	8.997	unhulled	0.97	1	N	NA	NA
B	10/11/2016	am	BT	8.997	unhulled	0.93	1	N	NA	NA
B	10/11/2016	am	BT	8.997	unhulled	3.57	4	N	NA	NA
B	10/11/2016	am	BT	8.997	unhulled	0.81	1	N	NA	NA
B	10/11/2016	am	BT	8.997	unhulled	0.65	1	N	NA	NA
B	10/11/2016	am	BT	8.997	unhulled	NA	NA	N	NA	NA
B	10/11/2016	am	CH	7.974	hulled	5.75	2	N	NA	NA
B	10/11/2016	am	CH	7.974	hulled	7.46	4	N	NA	NA
B	10/11/2016	am	CH	7.974	hulled	7.38	4	N	NA	NA
B	10/11/2016	am	CH	7.974	hulled	14.75	8	N	NA	NA
B	10/11/2016	am	CH	7.974	hulled	7.52	5	N	NA	NA
B	10/11/2016	am	CH	7.974	hulled	8.03	6	N	NA	NA
B	10/11/2016	am	CH	7.974	hulled	6.55	5	N	NA	NA
B	10/11/2016	am	CH	7.974	hulled	0.78	1	N	NA	NA
B	10/11/2016	am	CH	7.974	hulled	0.65	1	N	NA	NA
B	10/11/2016	am	CH	7.974	hulled	0.41	1	N	NA	NA
B	10/11/2016	am	CH	7.974	hulled	0.34	1	N	NA	NA
B	10/11/2016	am	CH	7.974	hulled	NA	NA	Y	GO	CH
B	10/11/2016	am	CH	7.974	hulled	4.75	NA	N	NA	NA
B	10/11/2016	am	CH	7.974	unhulled	7.64	0	N	NA	NA
B	10/11/2016	am	CH	7.974	unhulled	25.12	4	N	NA	NA
B	10/11/2016	am	CH	7.974	unhulled	7.5	2	N	NA	NA
B	10/11/2016	am	CH	7.974	unhulled	25.62	7	N	NA	NA
B	10/11/2016	am	CH	7.974	unhulled	25.16	9	N	NA	NA
B	10/11/2016	am	CH	7.974	unhulled	10.32	4	N	NA	NA
B	10/11/2016	am	CH	7.974	unhulled	2.38	1	N	NA	NA
B	10/11/2016	am	CH	7.974	unhulled	13.29	7	N	NA	NA
B	10/11/2016	am	CH	7.974	unhulled	1.81	1	N	NA	NA
B	10/11/2016	am	CH	7.974	unhulled	1.36	1	N	NA	NA
B	10/11/2016	am	CH	7.974	unhulled	4.33	4	N	NA	NA
B	10/11/2016	am	CH	7.974	unhulled	1.05	1	N	NA	NA
B	10/11/2016	am	CH	7.974	unhulled	1.04	1	N	NA	NA
B	10/11/2016	am	CH	7.974	unhulled	1.78	2	N	NA	NA
B	10/11/2016	am	CH	7.974	unhulled	0.56	1	N	NA	NA
B	10/11/2016	am	CH	7.974	unhulled	0.52	1	N	NA	NA
B	10/11/2016	am	CH	7.974	unhulled	NA	NA	Y	R.	CH
B	10/11/2016	am	CH	7.974	unhulled	NA	NA	Y	CH	GO
B	10/11/2016	am	CH	7.974	unhulled	NA	NA	N	NA	NA
B	10/11/2016	am	CH	7.974	unhulled	NA	NA	N	NA	NA
B	10/11/2016	am	CH	7.974	unhulled	NA	NA	N	NA	NA
B	10/11/2016	am	CH	7.974	unhulled	NA	NA	N	NA	NA
B	10/11/2016	am	CH	7.974	unhulled	NA	NA	N	NA	NA
B	10/11/2016	am	CH	7.974	unhulled	NA	NA	N	NA	NA
B	10/11/2016	am	CH	7.974	unhulled	NA	NA	Y	CH	BT
B	10/11/2016	am	CH	7.974	unhulled	28.97	NA	N	NA	NA
B	10/11/2016	am	CH	7.974	unhulled	14.44	8	N	NA	NA
B	10/11/2016	am	CH	7.974	unhulled	7.22	NA	N	NA	NA
B	10/11/2016	am	CH	7.974	unhulled	5.43	NA	N	NA	NA
B	10/11/2016	am	CT	10	hulled	3.43	3	N	NA	NA
B	10/11/2016	am	CT	10	unhulled	2.59	1	N	NA	NA
B	10/11/2016	am	CT	10	unhulled	2.04	1	N	NA	NA
B	10/11/2016	am	GO	5.377	unhulled	115.28	46	Y	R.	GO
B	10/11/2016	am	GO	5.377	unhulled	23.07	11	Y	R.	GO
B	10/11/2016	am	GO	5.377	unhulled	NA	NA	Y	GO	BT
B	10/11/2016	am	GO	5.377	unhulled	NA	NA	Y	GO	CH
B	10/11/2016	am	GO	5.377	unhulled	NA	NA	Y	GO	CH
B	10/11/2016	am	GO	5.377	unhulled	NA	NA	Y	GO	CH
B	10/11/2016	am	GO	5.377	unhulled	NA	NA	Y	GO	GT
B	10/11/2016	am	GO	5.377	unhulled	NA	NA	N	NA	NA
B	10/11/2016	am	GO	5.377	unhulled	NA	NA	N	NA	NA
B	10/11/2016	am	GO	5.377	unhulled	NA	NA	N	NA	NA
B	10/11/2016	am	GO	5.377	unhulled	NA	NA	N	NA	NA
B	10/11/2016	am	GO	5.377	unhulled	NA	NA	N	NA	NA
B	10/11/2016	am	GO	5.377	unhulled	NA	NA	N	NA	NA
B	10/11/2016	am	GO	5.377	unhulled	NA	NA	N	NA	NA
B	10/11/2016	am	GO	5.377	unhulled	NA	NA	N	NA	NA
B	10/11/2016	am	GO	5.377	unhulled	NA	NA	N	NA	NA
B	10/11/2016	am	GO	5.377	unhulled	17.94	NA	Y	GT	GO
B	10/11/2016	am	GO	5.377	unhulled	92.53	NA	N	NA	NA
B	10/11/2016	am	GO	5.377	unhulled	9.82	NA	N	NA	NA
B	10/11/2016	am	GO	5.377	unhulled	66.71	NA	Y	GO	CH
B	10/11/2016	am	GO	5.377	unhulled	28.18	NA	Y	CH	GO
B	10/11/2016	am	GO	5.377	unhulled	10.72	NA	N	NA	NA
B	10/11/2016	am	GO	5.377	unhulled	41.79	NA	N	NA	NA
B	10/11/2016	am	GT	6.02	hulled	5.3	2	N	NA	NA
B	10/11/2016	am	GT	6.02	hulled	9.78	4	N	NA	NA
B	10/11/2016	am	GT	6.02	hulled	8.55	4	N	NA	NA
B	10/11/2016	am	GT	6.02	hulled	12.63	6	N	NA	NA
B	10/11/2016	am	GT	6.02	hulled	10.43	5	N	NA	NA
B	10/11/2016	am	GT	6.02	hulled	3.68	2	N	NA	NA
B	10/11/2016	am	GT	6.02	hulled	4.93	3	N	NA	NA
B	10/11/2016	am	GT	6.02	hulled	18.37	12	N	NA	NA
B	10/11/2016	am	GT	6.02	hulled	1.44	1	N	NA	NA
B	10/11/2016	am	GT	6.02	hulled	5.06	4	N	NA	NA
B	10/11/2016	am	GT	6.02	hulled	10.04	10	N	NA	NA
B	10/11/2016	am	GT	6.02	hulled	2.38	3	N	NA	NA
B	10/11/2016	am	GT	6.02	hulled	4.94	NA	N	NA	NA
B	10/11/2016	am	GT	6.02	unhulled	2.94	1	N	NA	NA
B	10/11/2016	am	GT	6.02	unhulled	10.78	4	N	NA	NA
B	10/11/2016	am	GT	6.02	unhulled	2.46	1	N	NA	NA
B	10/11/2016	am	GT	6.02	unhulled	2.25	1	N	NA	NA
B	10/11/2016	am	GT	6.02	unhulled	2	1	N	NA	NA
B	10/11/2016	am	GT	6.02	unhulled	1.93	1	N	NA	NA
B	10/11/2016	am	GT	6.02	unhulled	1.9	1	N	NA	NA
B	10/11/2016	am	GT	6.02	unhulled	1.79	1	N	NA	NA
B	10/11/2016	am	GT	6.02	unhulled	3.56	2	N	NA	NA
B	10/11/2016	am	GT	6.02	unhulled	1.62	1	N	NA	NA
B	10/11/2016	am	GT	6.02	unhulled	4.78	3	N	NA	NA
B	10/11/2016	am	GT	6.02	unhulled	1.51	1	N	NA	NA
B	10/11/2016	am	GT	6.02	unhulled	4.44	3	N	NA	NA
B	10/11/2016	am	GT	6.02	unhulled	2.5	2	N	NA	NA
B	10/11/2016	am	GT	6.02	unhulled	1.22	1	N	NA	NA
B	10/11/2016	am	GT	6.02	unhulled	2.14	2	N	NA	NA
B	10/11/2016	am	GT	6.02	unhulled	3.62	4	N	NA	NA
B	10/11/2016	am	GT	6.02	unhulled	0.32	1	N	NA	NA
B	10/11/2016	am	GT	6.02	unhulled	3.87	NA	N	NA	NA
B	10/11/2016	am	GR	2.115	unhulled	49.13	21	N	NA	NA
B	10/11/2016	am	GR	2.115	unhulled	NA	NA	N	NA	NA
B	10/11/2016	am	R.	3.942	unhulled	5.66	2	N	NA	NA
B	10/11/2016	am	R.	3.942	unhulled	1.82	1	N	NA	NA
B	10/11/2016	pm	BT	8.997	hulled	3.16	2	N	NA	NA
B	10/11/2016	pm	BT	8.997	hulled	NA	NA	N	NA	NA
B	10/11/2016	pm	BT	8.997	hulled	23.13	NA	N	NA	NA
B	10/11/2016	pm	BT	8.997	hulled	9.3	NA	N	NA	NA
B	10/11/2016	pm	BT	8.997	hulled	4.88	NA	N	NA	NA
B	10/11/2016	pm	BT	8.997	unhulled	1.66	1	N	NA	NA
B	10/11/2016	pm	BT	8.997	unhulled	3.39	3	N	NA	NA
B	10/11/2016	pm	BT	8.997	unhulled	3.24	NA	N	NA	NA
B	10/11/2016	pm	BT	8.997	unhulled	3.63	NA	N	NA	NA
B	10/11/2016	pm	BT	8.997	unhulled	3.57	NA	N	NA	NA
B	10/11/2016	pm	BT	8.997	unhulled	2.49	NA	N	NA	NA
B	10/11/2016	pm	BT	8.997	unhulled	2.14	NA	N	NA	NA
B	10/11/2016	pm	BT	8.997	unhulled	1.75	NA	N	NA	NA
B	10/11/2016	pm	BT	8.997	unhulled	1.63	NA	N	NA	NA
B	10/11/2016	pm	BT	8.997	unhulled	1.41	NA	N	NA	NA
B	10/11/2016	pm	BT	8.997	unhulled	179.95	NA	N	NA	NA
B	10/11/2016	pm	CH	7.974	hulled	0.46	1	N	NA	NA
B	10/11/2016	pm	CH	7.974	hulled	7.03	NA	N	NA	NA
B	10/11/2016	pm	CH	7.974	unhulled	38.62	10	N	NA	NA
B	10/11/2016	pm	CH	7.974	unhulled	8.14	4	N	NA	NA
B	10/11/2016	pm	CH	7.974	unhulled	1.72	1	N	NA	NA
B	10/11/2016	pm	CH	7.974	unhulled	1.36	1	N	NA	NA
B	10/11/2016	pm	CH	7.974	unhulled	4.94	4	N	NA	NA
B	10/11/2016	pm	CH	7.974	unhulled	4.1	4	N	NA	NA
B	10/11/2016	pm	CH	7.974	unhulled	0.75	1	N	NA	NA
B	10/11/2016	pm	CH	7.974	unhulled	2.15	NA	N	NA	NA
B	10/11/2016	pm	GT	6.02	hulled	5.19	1	N	NA	NA
B	10/11/2016	pm	GT	6.02	hulled	5.28	2	N	NA	NA
B	10/11/2016	pm	GT	6.02	hulled	6.54	4	N	NA	NA
B	10/11/2016	pm	GT	6.02	hulled	9.38	6	N	NA	NA
B	10/11/2016	pm	GT	6.02	hulled	6.25	6	N	NA	NA
B	10/11/2016	pm	GT	6.02	hulled	NA	NA	N	NA	NA
B	10/11/2016	pm	GT	6.02	hulled	2.82	NA	N	NA	NA
B	10/11/2016	pm	GT	6.02	hulled	4.75	NA	N	NA	NA
B	10/11/2016	pm	GT	6.02	hulled	3.71	NA	N	NA	NA
B	10/11/2016	pm	GT	6.02	hulled	2.63	NA	N	NA	NA
B	10/11/2016	pm	GT	6.02	hulled	2.3	NA	N	NA	NA
B	10/11/2016	pm	GT	6.02	unhulled	1.91	1	N	NA	NA
B	10/11/2016	pm	GT	6.02	unhulled	1.31	1	N	NA	NA
B	10/11/2016	pm	GT	6.02	unhulled	1.28	1	N	NA	NA
B	10/11/2016	pm	GT	6.02	unhulled	2.32	3	N	NA	NA
B	10/11/2016	pm	GT	6.02	unhulled	5.03	NA	N	NA	NA
B	10/11/2016	pm	GT	6.02	unhulled	1.69	NA	N	NA	NA
A	11/11/2016	am	BT	8.997	hulled	20.1	11	N	NA	NA
A	11/11/2016	am	BT	8.997	hulled	7.78	5	N	NA	NA
A	11/11/2016	am	BT	8.997	hulled	4.56	3	N	NA	NA
A	11/11/2016	am	BT	8.997	hulled	8.75	6	N	NA	NA
A	11/11/2016	am	BT	8.997	hulled	13.12	11	N	NA	NA
A	11/11/2016	am	BT	8.997	hulled	0.81	1	N	NA	NA
A	11/11/2016	am	BT	8.997	unhulled	8.93	3	N	NA	NA
A	11/11/2016	am	BT	8.997	unhulled	2.57	1	N	NA	NA
A	11/11/2016	am	BT	8.997	unhulled	4.5	2	N	NA	NA
A	11/11/2016	am	BT	8.997	unhulled	2.19	1	N	NA	NA
A	11/11/2016	am	BT	8.997	unhulled	2.16	1	N	NA	NA
A	11/11/2016	am	BT	8.997	unhulled	2.12	1	N	NA	NA
A	11/11/2016	am	BT	8.997	unhulled	2.1	1	N	NA	NA
A	11/11/2016	am	BT	8.997	unhulled	1.91	1	N	NA	NA
A	11/11/2016	am	BT	8.997	unhulled	5.54	3	N	NA	NA
A	11/11/2016	am	BT	8.997	unhulled	1.63	1	N	NA	NA
A	11/11/2016	am	BT	8.997	unhulled	3.09	2	N	NA	NA
A	11/11/2016	am	BT	8.997	unhulled	1.47	1	N	NA	NA
A	11/11/2016	am	BT	8.997	unhulled	2.61	2	N	NA	NA
A	11/11/2016	am	BT	8.997	unhulled	1.28	1	N	NA	NA
A	11/11/2016	am	BT	8.997	unhulled	8.62	7	N	NA	NA
A	11/11/2016	am	BT	8.997	unhulled	1.18	1	N	NA	NA
A	11/11/2016	am	BT	8.997	unhulled	1.12	1	N	NA	NA
A	11/11/2016	am	BT	8.997	unhulled	2.07	2	N	NA	NA
A	11/11/2016	am	BT	8.997	unhulled	1.03	1	N	NA	NA
A	11/11/2016	am	BT	8.997	unhulled	2.84	3	N	NA	NA
A	11/11/2016	am	BT	8.997	unhulled	0.79	1	N	NA	NA
A	11/11/2016	am	BT	8.997	unhulled	0.75	1	N	NA	NA
A	11/11/2016	am	BT	8.997	unhulled	16.16	NA	N	NA	NA
A	11/11/2016	am	BT	8.997	unhulled	1.46	NA	N	NA	NA
A	11/11/2016	am	CH	7.974	hulled	5.72	3	N	NA	NA
A	11/11/2016	am	CH	7.974	unhulled	74.75	15	N	NA	NA
A	11/11/2016	am	CH	7.974	unhulled	2.31	1	N	NA	NA
A	11/11/2016	am	CH	7.974	unhulled	3.5	2	N	NA	NA
A	11/11/2016	am	CH	7.974	unhulled	12.53	8	N	NA	NA
A	11/11/2016	am	CH	7.974	unhulled	2.72	2	N	NA	NA
A	11/11/2016	am	CH	7.974	unhulled	10.6	8	N	NA	NA
A	11/11/2016	am	CH	7.974	unhulled	1.21	1	N	NA	NA
A	11/11/2016	am	CH	7.974	unhulled	1.19	1	N	NA	NA
A	11/11/2016	am	CH	7.974	unhulled	2.29	2	N	NA	NA
A	11/11/2016	am	CH	7.974	unhulled	1.78	2	N	NA	NA
A	11/11/2016	am	CH	7.974	unhulled	5	6	N	NA	NA
A	11/11/2016	am	CH	7.974	unhulled	NA	NA	N	NA	NA
A	11/11/2016	am	CH	7.974	unhulled	9.94	NA	N	NA	NA
A	11/11/2016	am	CH	7.974	unhulled	7.37	NA	N	NA	NA
A	11/11/2016	am	CH	7.974	unhulled	9.19	NA	N	NA	NA
A	11/11/2016	am	CH	7.974	unhulled	1.14	NA	N	NA	NA
A	11/11/2016	am	CT	10	hulled	10.16	4	N	NA	NA
A	11/11/2016	am	CT	10	unhulled	1.65	1	N	NA	NA
A	11/11/2016	am	CT	10	unhulled	5.59	4	N	NA	NA
A	11/11/2016	am	CT	10	unhulled	2.47	2	N	NA	NA
A	11/11/2016	am	CT	10	unhulled	3.47	3	N	NA	NA
A	11/11/2016	am	CT	10	unhulled	1.06	1	N	NA	NA
A	11/11/2016	am	CT	10	unhulled	3.44	NA	N	NA	NA
A	11/11/2016	am	D.	6.533	hulled	32.59	19	N	NA	NA
A	11/11/2016	am	D.	6.533	hulled	2.81	3	N	NA	NA
A	11/11/2016	am	D.	6.533	hulled	1.51	1	N	NA	NA
A	11/11/2016	am	D.	6.533	hulled	2.1	2	N	NA	NA
A	11/11/2016	am	D.	6.533	hulled	7.85	NA	N	NA	NA
A	11/11/2016	am	D.	6.533	unhulled	2.09	1	N	NA	NA
A	11/11/2016	am	D.	6.533	unhulled	13.16	6	N	NA	NA
A	11/11/2016	am	D.	6.533	unhulled	5.88	3	N	NA	NA
A	11/11/2016	am	GT	6.02	hulled	10.16	3	N	NA	NA
A	11/11/2016	am	GT	6.02	hulled	NA	NA	N	NA	NA
A	11/11/2016	am	GT	6.02	hulled	10.03	NA	N	NA	NA
A	11/11/2016	am	GT	6.02	unhulled	1.94	1	N	NA	NA
A	11/11/2016	am	GT	6.02	unhulled	2.91	2	N	NA	NA
A	11/11/2016	am	GT	6.02	unhulled	1.22	1	N	NA	NA
A	11/11/2016	am	GT	6.02	unhulled	1.04	1	N	NA	NA
A	11/11/2016	am	GT	6.02	unhulled	1.97	2	N	NA	NA
A	11/11/2016	am	GT	6.02	unhulled	2	NA	N	NA	NA
A	11/11/2016	am	GR	2.115	hulled	6.88	NA	Y	HS	GR
A	11/11/2016	am	GR	2.115	hulled	20.06	NA	N	NA	NA
A	11/11/2016	am	GR	2.115	unhulled	95.1	22	N	NA	NA
A	11/11/2016	am	GR	2.115	unhulled	38.81	9	N	NA	NA
A	11/11/2016	am	GR	2.115	unhulled	86.47	21	N	NA	NA
A	11/11/2016	am	GR	2.115	unhulled	63.28	18	N	NA	NA
A	11/11/2016	am	GR	2.115	unhulled	58.25	24	N	NA	NA
A	11/11/2016	am	GR	2.115	unhulled	NA	NA	Y	GR	CH
A	11/11/2016	am	GR	2.115	unhulled	NA	NA	N	NA	NA
A	11/11/2016	am	GR	2.115	unhulled	NA	NA	Y	GR	HS
A	11/11/2016	am	GR	2.115	unhulled	NA	NA	Y	GR	HS
A	11/11/2016	am	GR	2.115	unhulled	91.9	NA	N	NA	NA
A	11/11/2016	am	GR	2.115	unhulled	15.38	NA	N	NA	NA
A	11/11/2016	am	GR	2.115	unhulled	45.87	NA	N	NA	NA
A	11/11/2016	am	GR	2.115	unhulled	32.63	NA	N	NA	NA
A	11/11/2016	am	GR	2.115	unhulled	12.12	NA	N	NA	NA
A	11/11/2016	am	GR	2.115	unhulled	107.29	NA	N	NA	NA
A	11/11/2016	am	HS	1.044	hulled	9.56	4	N	NA	NA
A	11/11/2016	am	HS	1.044	hulled	4.38	NA	N	NA	NA
A	11/11/2016	am	HS	1.044	unhulled	43.75	13	N	NA	NA
A	11/11/2016	am	HS	1.044	unhulled	22.81	9	N	NA	NA
A	11/11/2016	am	HS	1.044	unhulled	28.61	12	N	NA	NA
A	11/11/2016	am	HS	1.044	unhulled	56.44	24	N	NA	NA
A	11/11/2016	am	HS	1.044	unhulled	2.75	2	N	NA	NA
A	11/11/2016	am	HS	1.044	unhulled	1.31	1	N	NA	NA
A	11/11/2016	am	HS	1.044	unhulled	17.81	14	N	NA	NA
A	11/11/2016	am	HS	1.044	unhulled	9.37	8	N	NA	NA
A	11/11/2016	am	HS	1.044	unhulled	15.69	14	N	NA	NA
A	11/11/2016	am	HS	1.044	unhulled	2.94	3	N	NA	NA
A	11/11/2016	am	HS	1.044	unhulled	2.75	3	N	NA	NA
A	11/11/2016	am	HS	1.044	unhulled	1.63	2	N	NA	NA
A	11/11/2016	am	HS	1.044	unhulled	NA	NA	N	NA	NA
A	11/11/2016	am	HS	1.044	unhulled	NA	NA	N	NA	NA
A	11/11/2016	am	HS	1.044	unhulled	NA	NA	N	NA	NA
A	11/11/2016	am	HS	1.044	unhulled	NA	NA	N	NA	NA
A	11/11/2016	am	HS	1.044	unhulled	4.67	NA	Y	HS	GR
A	11/11/2016	am	HS	1.044	unhulled	14.5	NA	N	NA	NA
A	11/11/2016	am	HS	1.044	unhulled	14.22	NA	N	NA	NA
A	11/11/2016	am	HS	1.044	unhulled	9.97	NA	N	NA	NA
A	11/11/2016	am	HS	1.044	unhulled	8.92	NA	N	NA	NA
A	11/11/2016	am	R.	3.942	unhulled	10.82	8	N	NA	NA
A	11/11/2016	am	R.	3.942	unhulled	2.53	3	N	NA	NA
A	11/11/2016	pm	BT	8.997	hulled	10.53	NA	N	NA	NA
A	11/11/2016	pm	BT	8.997	unhulled	2.91	1	N	NA	NA
A	11/11/2016	pm	BT	8.997	unhulled	2.69	1	N	NA	NA
A	11/11/2016	pm	BT	8.997	unhulled	2	1	N	NA	NA
A	11/11/2016	pm	BT	8.997	unhulled	3.51	2	N	NA	NA
A	11/11/2016	pm	BT	8.997	unhulled	1.72	1	N	NA	NA
A	11/11/2016	pm	BT	8.997	unhulled	2.9	2	N	NA	NA
A	11/11/2016	pm	BT	8.997	unhulled	7.19	5	Y	GT	BT
A	11/11/2016	pm	BT	8.997	unhulled	1.26	1	N	NA	NA
A	11/11/2016	pm	BT	8.997	unhulled	1.12	1	N	NA	NA
A	11/11/2016	pm	BT	8.997	unhulled	1.1	1	N	NA	NA
A	11/11/2016	pm	BT	8.997	unhulled	3.29	3	N	NA	NA
A	11/11/2016	pm	BT	8.997	unhulled	1.05	1	N	NA	NA
A	11/11/2016	pm	BT	8.997	unhulled	3.15	3	N	NA	NA
A	11/11/2016	pm	BT	8.997	unhulled	1.93	2	N	NA	NA
A	11/11/2016	pm	BT	8.997	unhulled	0.94	1	N	NA	NA
A	11/11/2016	pm	BT	8.997	unhulled	0.93	1	N	NA	NA
A	11/11/2016	pm	BT	8.997	unhulled	2.5	3	N	NA	NA
A	11/11/2016	pm	BT	8.997	unhulled	3.04	4	Y	BT	CT
A	11/11/2016	pm	BT	8.997	unhulled	1.5	2	N	NA	NA
A	11/11/2016	pm	BT	8.997	unhulled	1.49	2	N	NA	NA
A	11/11/2016	pm	BT	8.997	unhulled	0.69	1	N	NA	NA
A	11/11/2016	pm	BT	8.997	unhulled	1.37	2	N	NA	NA
A	11/11/2016	pm	BT	8.997	unhulled	1.34	2	N	NA	NA
A	11/11/2016	pm	BT	8.997	unhulled	1.98	3	N	NA	NA
A	11/11/2016	pm	BT	8.997	unhulled	1.19	2	N	NA	NA
A	11/11/2016	pm	BT	8.997	unhulled	1.19	2	N	NA	NA
A	11/11/2016	pm	BT	8.997	unhulled	4.25	NA	Y	GT	BT
A	11/11/2016	pm	BT	8.997	unhulled	3.59	NA	N	NA	NA
A	11/11/2016	pm	BT	8.997	unhulled	3.06	NA	N	NA	NA
A	11/11/2016	pm	BT	8.997	unhulled	2.96	NA	N	NA	NA
A	11/11/2016	pm	BT	8.997	unhulled	2.78	NA	N	NA	NA
A	11/11/2016	pm	BT	8.997	unhulled	2.38	NA	N	NA	NA
A	11/11/2016	pm	BT	8.997	unhulled	2.28	NA	N	NA	NA
A	11/11/2016	pm	BT	8.997	unhulled	2.07	NA	N	NA	NA
A	11/11/2016	pm	BT	8.997	unhulled	2.07	NA	N	NA	NA
A	11/11/2016	pm	BT	8.997	unhulled	2.06	NA	N	NA	NA
A	11/11/2016	pm	BT	8.997	unhulled	2.01	NA	N	NA	NA
A	11/11/2016	pm	BT	8.997	unhulled	2	NA	N	NA	NA
A	11/11/2016	pm	BT	8.997	unhulled	1.7	NA	N	NA	NA
A	11/11/2016	pm	BT	8.997	unhulled	1.5	NA	N	NA	NA
A	11/11/2016	pm	BT	8.997	unhulled	1.43	NA	N	NA	NA
A	11/11/2016	pm	BT	8.997	unhulled	1.22	NA	N	NA	NA
A	11/11/2016	pm	BT	8.997	unhulled	1.13	NA	N	NA	NA
A	11/11/2016	pm	BT	8.997	unhulled	6.59	NA	N	NA	NA
A	11/11/2016	pm	BT	8.997	unhulled	2.75	NA	N	NA	NA
A	11/11/2016	pm	BT	8.997	unhulled	2.34	NA	N	NA	NA
A	11/11/2016	pm	BT	8.997	unhulled	1.45	NA	N	NA	NA
A	11/11/2016	pm	CH	7.974	unhulled	16.72	6	N	NA	NA
A	11/11/2016	pm	CH	7.974	unhulled	5.28	2	N	NA	NA
A	11/11/2016	pm	CH	7.974	unhulled	13.38	7	N	NA	NA
A	11/11/2016	pm	CH	7.974	unhulled	4.8	3	N	NA	NA
A	11/11/2016	pm	CH	7.974	unhulled	1.34	1	N	NA	NA
A	11/11/2016	pm	CH	7.974	unhulled	4.56	4	N	NA	NA
A	11/11/2016	pm	CH	7.974	unhulled	3.13	3	N	NA	NA
A	11/11/2016	pm	CH	7.974	unhulled	0.87	1	N	NA	NA
A	11/11/2016	pm	CH	7.974	unhulled	6.06	8	N	NA	NA
A	11/11/2016	pm	CH	7.974	unhulled	NA	NA	N	NA	NA
A	11/11/2016	pm	CH	7.974	unhulled	NA	NA	N	NA	NA
A	11/11/2016	pm	CH	7.974	unhulled	NA	NA	Y	GT	CH
A	11/11/2016	pm	CH	7.974	unhulled	NA	NA	N	NA	NA
A	11/11/2016	pm	CH	7.974	unhulled	9.8	NA	N	NA	NA
A	11/11/2016	pm	CH	7.974	unhulled	1.6	NA	N	NA	NA
A	11/11/2016	pm	CH	7.974	unhulled	24.03	NA	N	NA	NA
A	11/11/2016	pm	CH	7.974	unhulled	5.03	NA	Y	GR	CH
A	11/11/2016	pm	CH	7.974	unhulled	5.12	NA	N	NA	NA
A	11/11/2016	pm	CH	7.974	unhulled	4.84	NA	N	NA	NA
A	11/11/2016	pm	CH	7.974	unhulled	3.34	NA	N	NA	NA
A	11/11/2016	pm	CH	7.974	unhulled	9.8	NA	N	NA	NA
A	11/11/2016	pm	CH	7.974	unhulled	3.31	NA	N	NA	NA
A	11/11/2016	pm	CH	7.974	unhulled	1.78	NA	N	NA	NA
A	11/11/2016	pm	CH	7.974	unhulled	1.59	NA	N	NA	NA
A	11/11/2016	pm	CT	10	hulled	14.94	8	N	NA	NA
A	11/11/2016	pm	CT	10	hulled	10.63	9	N	NA	NA
A	11/11/2016	pm	CT	10	hulled	17.4	NA	N	NA	NA
A	11/11/2016	pm	CT	10	hulled	1.38	NA	N	NA	NA
A	11/11/2016	pm	CT	10	unhulled	3.91	1	N	NA	NA
A	11/11/2016	pm	CT	10	unhulled	2.61	1	N	NA	NA
A	11/11/2016	pm	CT	10	unhulled	1.72	1	N	NA	NA
A	11/11/2016	pm	CT	10	unhulled	1.63	1	N	NA	NA
A	11/11/2016	pm	CT	10	unhulled	1.54	1	N	NA	NA
A	11/11/2016	pm	CT	10	unhulled	1.51	1	Y	BT	CT
A	11/11/2016	pm	CT	10	unhulled	2.72	2	N	NA	NA
A	11/11/2016	pm	CT	10	unhulled	4.94	4	N	NA	NA
A	11/11/2016	pm	CT	10	unhulled	1.13	1	N	NA	NA
A	11/11/2016	pm	CT	10	unhulled	5.54	6	N	NA	NA
A	11/11/2016	pm	CT	10	unhulled	2.56	NA	Y	BT	CT
A	11/11/2016	pm	CT	10	unhulled	7.59	NA	N	NA	NA
A	11/11/2016	pm	CT	10	unhulled	NA	NA	N	NA	NA
A	11/11/2016	pm	D.	6.533	unhulled	9.85	NA	N	NA	NA
A	11/11/2016	pm	GO	5.377	unhulled	133.28	NA	N	NA	NA
A	11/11/2016	pm	GT	6.02	hulled	13.51	NA	N	NA	NA
A	11/11/2016	pm	GT	6.02	hulled	13.19	NA	N	NA	NA
A	11/11/2016	pm	GT	6.02	hulled	4.35	NA	N	NA	NA
A	11/11/2016	pm	GT	6.02	unhulled	14.09	4	N	NA	NA
A	11/11/2016	pm	GT	6.02	unhulled	2.96	1	Y	GT	BT
A	11/11/2016	pm	GT	6.02	unhulled	4.48	2	N	NA	NA
A	11/11/2016	pm	GT	6.02	unhulled	2.14	1	N	NA	NA
A	11/11/2016	pm	GT	6.02	unhulled	3.8	2	N	NA	NA
A	11/11/2016	pm	GT	6.02	unhulled	1.87	1	N	NA	NA
A	11/11/2016	pm	GT	6.02	unhulled	18.18	10	N	NA	NA
A	11/11/2016	pm	GT	6.02	unhulled	1.52	1	N	NA	NA
A	11/11/2016	pm	GT	6.02	unhulled	3.03	2	N	NA	NA
A	11/11/2016	pm	GT	6.02	unhulled	1.45	1	N	NA	NA
A	11/11/2016	pm	GT	6.02	unhulled	8.69	6	N	NA	NA
A	11/11/2016	pm	GT	6.02	unhulled	1.38	1	N	NA	NA
A	11/11/2016	pm	GT	6.02	unhulled	4.04	3	N	NA	NA
A	11/11/2016	pm	GT	6.02	unhulled	3.84	3	Y	GT	BT
A	11/11/2016	pm	GT	6.02	unhulled	1.28	1	N	NA	NA
A	11/11/2016	pm	GT	6.02	unhulled	5.75	5	N	NA	NA
A	11/11/2016	pm	GT	6.02	unhulled	2.16	2	N	NA	NA
A	11/11/2016	pm	GT	6.02	unhulled	2.12	2	N	NA	NA
A	11/11/2016	pm	GT	6.02	unhulled	2.94	3	N	NA	NA
A	11/11/2016	pm	GT	6.02	unhulled	2.94	3	N	NA	NA
A	11/11/2016	pm	GT	6.02	unhulled	0.93	1	N	NA	NA
A	11/11/2016	pm	GT	6.02	unhulled	0.91	1	N	NA	NA
A	11/11/2016	pm	GT	6.02	unhulled	0.9	1	N	NA	NA
A	11/11/2016	pm	GT	6.02	unhulled	4.35	5	N	NA	NA
A	11/11/2016	pm	GT	6.02	unhulled	4.28	5	N	NA	NA
A	11/11/2016	pm	GT	6.02	unhulled	4.15	6	Y	GR	GT
A	11/11/2016	pm	GT	6.02	unhulled	NA	NA	N	NA	NA
A	11/11/2016	pm	GT	6.02	unhulled	NA	NA	Y	GT	R.
A	11/11/2016	pm	GT	6.02	unhulled	1.17	NA	Y	GT	CH
A	11/11/2016	pm	GT	6.02	unhulled	10.19	NA	N	NA	NA
A	11/11/2016	pm	GT	6.02	unhulled	4.28	NA	N	NA	NA
A	11/11/2016	pm	GT	6.02	unhulled	2.22	NA	N	NA	NA
A	11/11/2016	pm	GT	6.02	unhulled	1.97	NA	N	NA	NA
A	11/11/2016	pm	GT	6.02	unhulled	1.82	NA	N	NA	NA
A	11/11/2016	pm	GT	6.02	unhulled	1.68	NA	N	NA	NA
A	11/11/2016	pm	GT	6.02	unhulled	1.63	NA	N	NA	NA
A	11/11/2016	pm	GT	6.02	unhulled	1.47	NA	N	NA	NA
A	11/11/2016	pm	GT	6.02	unhulled	1.44	NA	N	NA	NA
A	11/11/2016	pm	GT	6.02	unhulled	1.41	NA	N	NA	NA
A	11/11/2016	pm	GT	6.02	unhulled	1.13	NA	N	NA	NA
A	11/11/2016	pm	GT	6.02	unhulled	1.13	NA	N	NA	NA
A	11/11/2016	pm	GT	6.02	unhulled	4.07	NA	N	NA	NA
A	11/11/2016	pm	GT	6.02	unhulled	3.32	NA	N	NA	NA
A	11/11/2016	pm	GT	6.02	unhulled	3.12	NA	N	NA	NA
A	11/11/2016	pm	GT	6.02	unhulled	1.5	NA	N	NA	NA
A	11/11/2016	pm	GR	2.115	unhulled	149.03	41	Y	GR	GT
A	11/11/2016	pm	GR	2.115	unhulled	68.87	22	N	NA	NA
A	11/11/2016	pm	GR	2.115	unhulled	78.35	26	Y	GR	CH
A	11/11/2016	pm	GR	2.115	unhulled	NA	NA	Y	GR	CH
A	11/11/2016	pm	GR	2.115	unhulled	NA	NA	N	NA	NA
A	11/11/2016	pm	GR	2.115	unhulled	31.56	NA	N	NA	NA
A	11/11/2016	pm	GR	2.115	unhulled	14.6	NA	N	NA	NA
A	11/11/2016	pm	HS	1.044	unhulled	12.3	6	N	NA	NA
A	11/11/2016	pm	HS	1.044	unhulled	1.57	1	N	NA	NA
A	11/11/2016	pm	HS	1.044	unhulled	2.9	2	N	NA	NA
A	11/11/2016	pm	R.	3.942	unhulled	2.56	3	N	NA	NA
A	11/11/2016	pm	R.	3.942	unhulled	2.11	3	N	NA	NA
A	11/11/2016	pm	R.	3.942	unhulled	0.45	1	N	NA	NA
A	11/11/2016	pm	R.	3.942	unhulled	2.11	NA	N	NA	NA
A	11/11/2016	pm	R.	3.942	unhulled	5.09	NA	N	NA	NA
A	11/11/2016	pm	R.	3.942	unhulled	21.12	NA	Y	GT	R.
B	11/11/2016	pm	BT	8.997	unhulled	1.75	1	N	NA	NA
B	11/11/2016	pm	BT	8.997	unhulled	1.63	1	N	NA	NA
B	12/11/2016	pm	BT	8.997	unhulled	1	1	N	NA	NA
B	12/11/2016	pm	CH	7.974	unhulled	3.16	1	N	NA	NA
B	12/11/2016	pm	CH	7.974	unhulled	10.43	4	N	NA	NA
B	12/11/2016	pm	CH	7.974	unhulled	4.69	2	N	NA	NA
B	12/11/2016	pm	CH	7.974	unhulled	5.34	3	N	NA	NA
B	12/11/2016	pm	CH	7.974	unhulled	1.13	1	N	NA	NA
B	12/11/2016	pm	CH	7.974	unhulled	0.97	1	N	NA	NA
B	12/11/2016	pm	CH	7.974	unhulled	0.75	1	N	NA	NA
B	12/11/2016	pm	CH	7.974	unhulled	0.47	1	N	NA	NA
B	12/11/2016	pm	CT	10	unhulled	4.13	2	N	NA	NA
B	12/11/2016	pm	CT	10	unhulled	1.72	1	N	NA	NA
B	12/11/2016	pm	CT	10	unhulled	1.53	1	N	NA	NA
B	12/11/2016	pm	CT	10	unhulled	1.22	1	N	NA	NA
B	12/11/2016	pm	CT	10	unhulled	1.12	1	N	NA	NA
B	12/11/2016	pm	CT	10	unhulled	1.12	1	N	NA	NA
B	12/11/2016	pm	CT	10	unhulled	1	1	N	NA	NA
B	12/11/2016	pm	CT	10	unhulled	1.9	2	N	NA	NA
B	12/11/2016	pm	CT	10	unhulled	0.72	1	N	NA	NA
B	12/11/2016	pm	CT	10	unhulled	0.69	1	N	NA	NA
B	12/11/2016	pm	CT	10	unhulled	0.58	1	N	NA	NA
B	12/11/2016	pm	GT	6.02	unhulled	1.19	0	N	NA	NA
B	12/11/2016	pm	GT	6.02	unhulled	3.59	1	N	NA	NA
B	12/11/2016	pm	GT	6.02	unhulled	2.59	1	N	NA	NA
B	12/11/2016	pm	GT	6.02	unhulled	1.85	1	N	NA	NA
B	12/11/2016	pm	GT	6.02	unhulled	1.59	1	N	NA	NA
B	12/11/2016	pm	GT	6.02	unhulled	1.59	1	N	NA	NA
B	12/11/2016	pm	GT	6.02	unhulled	1.32	1	N	NA	NA
B	12/11/2016	pm	GT	6.02	unhulled	1.28	1	N	NA	NA
B	12/11/2016	pm	GT	6.02	unhulled	1.22	1	N	NA	NA
B	12/11/2016	pm	GT	6.02	unhulled	1.19	1	N	NA	NA
B	12/11/2016	pm	GT	6.02	unhulled	2.37	2	N	NA	NA
B	12/11/2016	pm	GT	6.02	unhulled	1.16	1	N	NA	NA
B	12/11/2016	pm	GT	6.02	unhulled	1.09	1	N	NA	NA
B	12/11/2016	pm	GT	6.02	unhulled	1.06	1	N	NA	NA
B	12/11/2016	pm	GT	6.02	unhulled	0.84	1	N	NA	NA
B	12/11/2016	pm	GT	6.02	unhulled	0.81	1	N	NA	NA
B	12/11/2016	pm	GR	2.115	unhulled	4.22	2	N	NA	NA
B	12/11/2016	pm	GR	2.115	unhulled	2.95	2	N	NA	NA
B	12/11/2016	pm	GR	2.115	unhulled	8.34	NA	N	NA	NA
B	12/11/2016	pm	R.	3.942	unhulled	8.85	5	N	NA	NA
B	12/11/2016	pm	R.	3.942	unhulled	1.56	1	N	NA	NA
B	12/11/2016	pm	R.	3.942	unhulled	1.34	1	N	NA	NA
B	12/11/2016	pm	R.	3.942	unhulled	0.97	1	N	NA	NA
B	12/11/2016	pm	R.	3.942	unhulled	2.62	3	N	NA	NA
B	12/11/2016	pm	R.	3.942	unhulled	1.19	3	N	NA	NA
C	13/11/2016	am	BT	8.997	hulled	8.7	4	N	NA	NA
C	13/11/2016	am	BT	8.997	hulled	3.79	NA	N	NA	NA
C	13/11/2016	am	BT	8.997	unhulled	2.5	1	N	NA	NA
C	13/11/2016	am	BT	8.997	unhulled	2.03	1	N	NA	NA
C	13/11/2016	am	BT	8.997	unhulled	1.91	1	N	NA	NA
C	13/11/2016	am	BT	8.997	unhulled	1.81	1	N	NA	NA
C	13/11/2016	am	BT	8.997	unhulled	1.78	1	N	NA	NA
C	13/11/2016	am	BT	8.997	unhulled	1.76	1	N	NA	NA
C	13/11/2016	am	BT	8.997	unhulled	3.47	2	N	NA	NA
C	13/11/2016	am	BT	8.997	unhulled	6.12	4	N	NA	NA
C	13/11/2016	am	BT	8.997	unhulled	1.42	1	N	NA	NA
C	13/11/2016	am	BT	8.997	unhulled	1.4	1	N	NA	NA
C	13/11/2016	am	BT	8.997	unhulled	2.78	2	N	NA	NA
C	13/11/2016	am	BT	8.997	unhulled	1.25	1	N	NA	NA
C	13/11/2016	am	BT	8.997	unhulled	4.89	4	N	NA	NA
C	13/11/2016	am	BT	8.997	unhulled	6.11	5	N	NA	NA
C	13/11/2016	am	BT	8.997	unhulled	1.22	1	N	NA	NA
C	13/11/2016	am	BT	8.997	unhulled	1.19	1	N	NA	NA
C	13/11/2016	am	BT	8.997	unhulled	2.23	2	N	NA	NA
C	13/11/2016	am	BT	8.997	unhulled	0.98	1	N	NA	NA
C	13/11/2016	am	BT	8.997	unhulled	0.96	1	Y	BT	CT
C	13/11/2016	am	BT	8.997	unhulled	5.78	NA	N	NA	NA
C	13/11/2016	am	BT	8.997	unhulled	2.8	NA	N	NA	NA
C	13/11/2016	am	CH	7.974	hulled	2.59	1	N	NA	NA
C	13/11/2016	am	CH	7.974	hulled	2.53	1	N	NA	NA
C	13/11/2016	am	CH	7.974	hulled	1.85	1	N	NA	NA
C	13/11/2016	am	CH	7.974	hulled	1.24	1	N	NA	NA
C	13/11/2016	am	CH	7.974	unhulled	12.9	3	N	NA	NA
C	13/11/2016	am	CH	7.974	unhulled	28.37	9	N	NA	NA
C	13/11/2016	am	CH	7.974	unhulled	10.26	7	N	NA	NA
C	13/11/2016	am	CH	7.974	unhulled	1.36	1	N	NA	NA
C	13/11/2016	am	CH	7.974	unhulled	3.45	3	Y	R.	CH
C	13/11/2016	am	CH	7.974	unhulled	4.23	4	Y	R.	CH
C	13/11/2016	am	CH	7.974	unhulled	0.81	1	N	NA	NA
C	13/11/2016	am	CH	7.974	unhulled	0.81	1	N	NA	NA
C	13/11/2016	am	CH	7.974	unhulled	0.94	2	N	NA	NA
C	13/11/2016	am	CH	7.974	unhulled	83.22	NA	N	NA	NA
C	13/11/2016	am	CH	7.974	unhulled	19.54	NA	N	NA	NA
C	13/11/2016	am	CH	7.974	unhulled	11.32	NA	N	NA	NA
C	13/11/2016	am	CH	7.974	unhulled	7.18	NA	N	NA	NA
C	13/11/2016	am	CH	7.974	unhulled	6.53	NA	N	NA	NA
C	13/11/2016	am	CT	10	hulled	33.12	12	N	NA	NA
C	13/11/2016	am	CT	10	hulled	14.33	6	N	NA	NA
C	13/11/2016	am	CT	10	hulled	2.31	1	N	NA	NA
C	13/11/2016	am	CT	10	hulled	6.22	3	N	NA	NA
C	13/11/2016	am	CT	10	hulled	7.62	4	N	NA	NA
C	13/11/2016	am	CT	10	hulled	3.62	2	N	NA	NA
C	13/11/2016	am	CT	10	hulled	3.54	2	Y	R.	CT
C	13/11/2016	am	CT	10	hulled	5.19	3	N	NA	NA
C	13/11/2016	am	CT	10	hulled	3.25	2	N	NA	NA
C	13/11/2016	am	CT	10	hulled	18.78	12	N	NA	NA
C	13/11/2016	am	CT	10	hulled	4.44	3	N	NA	NA
C	13/11/2016	am	CT	10	hulled	2.89	2	N	NA	NA
C	13/11/2016	am	CT	10	hulled	1.4	1	Y	GT	CT
C	13/11/2016	am	CT	10	hulled	1.38	1	N	NA	NA
C	13/11/2016	am	CT	10	hulled	5.68	5	N	NA	NA
C	13/11/2016	am	CT	10	hulled	5.57	5	N	NA	NA
C	13/11/2016	am	CT	10	hulled	1.01	1	N	NA	NA
C	13/11/2016	am	CT	10	hulled	9.9	10	N	NA	NA
C	13/11/2016	am	CT	10	hulled	6.84	7	N	NA	NA
C	13/11/2016	am	CT	10	hulled	3.84	4	N	NA	NA
C	13/11/2016	am	CT	10	hulled	3.69	4	N	NA	NA
C	13/11/2016	am	CT	10	hulled	10.04	11	N	NA	NA
C	13/11/2016	am	CT	10	hulled	5.35	6	N	NA	NA
C	13/11/2016	am	CT	10	hulled	9.85	12	N	NA	NA
C	13/11/2016	am	CT	10	hulled	0.78	1	N	NA	NA
C	13/11/2016	am	CT	10	hulled	42.41	NA	N	NA	NA
C	13/11/2016	am	CT	10	hulled	15.66	NA	N	NA	NA
C	13/11/2016	am	CT	10	hulled	11.55	NA	N	NA	NA
C	13/11/2016	am	CT	10	hulled	10.9	NA	N	NA	NA
C	13/11/2016	am	CT	10	hulled	5.61	NA	N	NA	NA
C	13/11/2016	am	CT	10	hulled	3.91	NA	N	NA	NA
C	13/11/2016	am	CT	10	hulled	2.57	NA	N	NA	NA
C	13/11/2016	am	CT	10	unhulled	2.59	1	N	NA	NA
C	13/11/2016	am	CT	10	unhulled	2.4	1	N	NA	NA
C	13/11/2016	am	CT	10	unhulled	2.34	1	N	NA	NA
C	13/11/2016	am	CT	10	unhulled	2.16	1	N	NA	NA
C	13/11/2016	am	CT	10	unhulled	2.1	1	N	NA	NA
C	13/11/2016	am	CT	10	unhulled	1.94	1	N	NA	NA
C	13/11/2016	am	CT	10	unhulled	1.91	1	N	NA	NA
C	13/11/2016	am	CT	10	unhulled	3.75	2	N	NA	NA
C	13/11/2016	am	CT	10	unhulled	1.87	1	N	NA	NA
C	13/11/2016	am	CT	10	unhulled	3.69	2	Y	CH	CT
C	13/11/2016	am	CT	10	unhulled	1.78	1	N	NA	NA
C	13/11/2016	am	CT	10	unhulled	1.78	1	N	NA	NA
C	13/11/2016	am	CT	10	unhulled	3.53	2	N	NA	NA
C	13/11/2016	am	CT	10	unhulled	5.12	3	N	NA	NA
C	13/11/2016	am	CT	10	unhulled	3.02	2	N	NA	NA
C	13/11/2016	am	CT	10	unhulled	2.96	2	N	NA	NA
C	13/11/2016	am	CT	10	unhulled	2.93	2	N	NA	NA
C	13/11/2016	am	CT	10	unhulled	1.44	1	N	NA	NA
C	13/11/2016	am	CT	10	unhulled	1.44	1	N	NA	NA
C	13/11/2016	am	CT	10	unhulled	1.43	1	N	NA	NA
C	13/11/2016	am	CT	10	unhulled	1.42	1	Y	NH	CT
C	13/11/2016	am	CT	10	unhulled	1.41	1	N	NA	NA
C	13/11/2016	am	CT	10	unhulled	1.4	1	N	NA	NA
C	13/11/2016	am	CT	10	unhulled	2.75	2	N	NA	NA
C	13/11/2016	am	CT	10	unhulled	1.36	1	N	NA	NA
C	13/11/2016	am	CT	10	unhulled	1.32	1	N	NA	NA
C	13/11/2016	am	CT	10	unhulled	1.31	1	N	NA	NA
C	13/11/2016	am	CT	10	unhulled	1.31	1	N	NA	NA
C	13/11/2016	am	CT	10	unhulled	1.3	1	N	NA	NA
C	13/11/2016	am	CT	10	unhulled	2.59	2	N	NA	NA
C	13/11/2016	am	CT	10	unhulled	3.85	3	N	NA	NA
C	13/11/2016	am	CT	10	unhulled	3.78	3	N	NA	NA
C	13/11/2016	am	CT	10	unhulled	1.23	1	Y	R.	CT
C	13/11/2016	am	CT	10	unhulled	1.21	1	N	NA	NA
C	13/11/2016	am	CT	10	unhulled	1.18	1	N	NA	NA
C	13/11/2016	am	CT	10	unhulled	2.32	2	N	NA	NA
C	13/11/2016	am	CT	10	unhulled	2.22	2	N	NA	NA
C	13/11/2016	am	CT	10	unhulled	3.32	3	N	NA	NA
C	13/11/2016	am	CT	10	unhulled	1.1	1	N	NA	NA
C	13/11/2016	am	CT	10	unhulled	1.1	1	N	NA	NA
C	13/11/2016	am	CT	10	unhulled	1.09	1	N	NA	NA
C	13/11/2016	am	CT	10	unhulled	1.06	1	N	NA	NA
C	13/11/2016	am	CT	10	unhulled	4.22	4	N	NA	NA
C	13/11/2016	am	CT	10	unhulled	1	1	Y	R.	CT
C	13/11/2016	am	CT	10	unhulled	1.95	2	N	NA	NA
C	13/11/2016	am	CT	10	unhulled	3.69	4	N	NA	NA
C	13/11/2016	am	CT	10	unhulled	3.56	4	N	NA	NA
C	13/11/2016	am	CT	10	unhulled	2.58	3	N	NA	NA
C	13/11/2016	am	CT	10	unhulled	7.73	9	N	NA	NA
C	13/11/2016	am	CT	10	unhulled	0.85	1	N	NA	NA
C	13/11/2016	am	CT	10	unhulled	0.84	1	Y	R.	CT
C	13/11/2016	am	CT	10	unhulled	0.82	1	N	NA	NA
C	13/11/2016	am	CT	10	unhulled	0.78	1	N	NA	NA
C	13/11/2016	am	CT	10	unhulled	2.03	3	N	NA	NA
C	13/11/2016	am	CT	10	unhulled	0.51	1	N	NA	NA
C	13/11/2016	am	CT	10	unhulled	0.4	1	Y	CH	CT
C	13/11/2016	am	CT	10	unhulled	4.25	NA	N	NA	NA
C	13/11/2016	am	CT	10	unhulled	1.85	NA	N	NA	NA
C	13/11/2016	am	GT	6.02	hulled	1.59	1	N	NA	NA
C	13/11/2016	am	GT	6.02	unhulled	3.12	1	N	NA	NA
C	13/11/2016	am	GT	6.02	unhulled	2.43	1	N	NA	NA
C	13/11/2016	am	GT	6.02	unhulled	4.76	2	N	NA	NA
C	13/11/2016	am	GT	6.02	unhulled	2.28	1	N	NA	NA
C	13/11/2016	am	GT	6.02	unhulled	2.19	1	N	NA	NA
C	13/11/2016	am	GT	6.02	unhulled	1.97	1	N	NA	NA
C	13/11/2016	am	GT	6.02	unhulled	3.88	2	N	NA	NA
C	13/11/2016	am	GT	6.02	unhulled	3.82	2	N	NA	NA
C	13/11/2016	am	GT	6.02	unhulled	2.97	2	N	NA	NA
C	13/11/2016	am	GT	6.02	unhulled	1.41	1	N	NA	NA
C	13/11/2016	am	GT	6.02	unhulled	5.37	4	N	NA	NA
C	13/11/2016	am	GT	6.02	unhulled	9.27	7	N	NA	NA
C	13/11/2016	am	GT	6.02	unhulled	1.09	1	N	NA	NA
C	13/11/2016	am	GT	6.02	unhulled	2.03	2	N	NA	NA
C	13/11/2016	am	GT	6.02	unhulled	0.92	1	N	NA	NA
C	13/11/2016	am	GT	6.02	unhulled	5.62	NA	N	NA	NA
C	13/11/2016	am	GT	6.02	unhulled	4.7	NA	N	NA	NA
C	13/11/2016	am	NH	2.998	hulled	12.44	8	Y	NH	CT
C	13/11/2016	am	NH	2.998	unhulled	5.93	2	N	NA	NA
C	13/11/2016	am	NH	2.998	unhulled	9.47	4	N	NA	NA
C	13/11/2016	am	NH	2.998	unhulled	6.88	3	N	NA	NA
C	13/11/2016	am	NH	2.998	unhulled	25.44	12	N	NA	NA
C	13/11/2016	am	NH	2.998	unhulled	19.75	12	N	NA	NA
C	13/11/2016	am	NH	2.998	unhulled	11.1	7	N	NA	NA
C	13/11/2016	am	NH	2.998	unhulled	31.59	20	N	NA	NA
C	13/11/2016	am	NH	2.998	unhulled	11	7	N	NA	NA
C	13/11/2016	am	NH	2.998	unhulled	5.85	4	N	NA	NA
C	13/11/2016	am	NH	2.998	unhulled	5.78	4	N	NA	NA
C	13/11/2016	am	NH	2.998	unhulled	30.8	22	N	NA	NA
C	13/11/2016	am	NH	2.998	unhulled	11.98	11	N	NA	NA
C	13/11/2016	am	NH	2.998	unhulled	4.18	4	Y	NH	CT
C	13/11/2016	am	NH	2.998	unhulled	15.66	15	N	NA	NA
C	13/11/2016	am	NH	2.998	unhulled	7.6	8	N	NA	NA
C	13/11/2016	am	NH	2.998	unhulled	15.04	NA	Y	NH	CT
C	13/11/2016	am	NH	2.998	unhulled	22.05	NA	N	NA	NA
C	13/11/2016	am	NH	2.998	unhulled	18.77	NA	N	NA	NA
C	13/11/2016	am	NH	2.998	unhulled	14.82	NA	N	NA	NA
C	13/11/2016	am	NH	2.998	unhulled	11.72	NA	N	NA	NA
C	13/11/2016	am	NH	2.998	unhulled	10.45	NA	N	NA	NA
C	13/11/2016	am	NH	2.998	unhulled	10.04	NA	N	NA	NA
C	13/11/2016	am	NH	2.998	unhulled	10	NA	N	NA	NA
C	13/11/2016	am	NH	2.998	unhulled	9.86	NA	N	NA	NA
C	13/11/2016	am	NH	2.998	unhulled	9.21	NA	N	NA	NA
C	13/11/2016	am	NH	2.998	unhulled	6.92	NA	N	NA	NA
C	13/11/2016	am	NH	2.998	unhulled	6.03	NA	N	NA	NA
C	13/11/2016	am	NH	2.998	unhulled	4.03	NA	N	NA	NA
C	13/11/2016	am	NH	2.998	unhulled	18.19	NA	N	NA	NA
C	13/11/2016	am	NH	2.998	unhulled	13.84	NA	N	NA	NA
C	13/11/2016	am	R.	3.942	unhulled	2.03	1	N	NA	NA
C	13/11/2016	am	R.	3.942	unhulled	9.58	7	N	NA	NA
C	13/11/2016	am	R.	3.942	unhulled	2.5	2	N	NA	NA
C	13/11/2016	am	R.	3.942	unhulled	0.88	1	N	NA	NA
C	13/11/2016	am	R.	3.942	unhulled	0.56	1	N	NA	NA
C	13/11/2016	am	R.	3.942	unhulled	3.7	NA	N	NA	NA
C	13/11/2016	am	R.	3.942	unhulled	2.19	NA	N	NA	NA
C	13/11/2016	pm	BT	8.997	hulled	19.16	10	N	NA	NA
C	13/11/2016	pm	BT	8.997	hulled	1.71	1	N	NA	NA
C	13/11/2016	pm	BT	8.997	hulled	7.53	6	N	NA	NA
C	13/11/2016	pm	BT	8.997	unhulled	0.9	0	N	NA	NA
C	13/11/2016	pm	BT	8.997	unhulled	2.34	1	N	NA	NA
C	13/11/2016	pm	BT	8.997	unhulled	4.56	2	Y	CH	BT
C	13/11/2016	pm	BT	8.997	unhulled	2.19	1	N	NA	NA
C	13/11/2016	pm	BT	8.997	unhulled	2.03	1	N	NA	NA
C	13/11/2016	pm	BT	8.997	unhulled	3.98	2	Y	GT	BT
C	13/11/2016	pm	BT	8.997	unhulled	1.98	1	N	NA	NA
C	13/11/2016	pm	BT	8.997	unhulled	1.88	1	N	NA	NA
C	13/11/2016	pm	BT	8.997	unhulled	1.86	1	N	NA	NA
C	13/11/2016	pm	BT	8.997	unhulled	1.75	1	N	NA	NA
C	13/11/2016	pm	BT	8.997	unhulled	1.68	1	N	NA	NA
C	13/11/2016	pm	BT	8.997	unhulled	1.56	1	N	NA	NA
C	13/11/2016	pm	BT	8.997	unhulled	4.62	3	N	NA	NA
C	13/11/2016	pm	BT	8.997	unhulled	1.51	1	Y	NH	BT
C	13/11/2016	pm	BT	8.997	unhulled	1.5	1	N	NA	NA
C	13/11/2016	pm	BT	8.997	unhulled	4.21	3	N	NA	NA
C	13/11/2016	pm	BT	8.997	unhulled	1.34	1	Y	BT	CT
C	13/11/2016	pm	BT	8.997	unhulled	1.31	1	Y	BT	CT
C	13/11/2016	pm	BT	8.997	unhulled	1.26	1	N	NA	NA
C	13/11/2016	pm	BT	8.997	unhulled	2.44	2	N	NA	NA
C	13/11/2016	pm	BT	8.997	unhulled	1.13	1	N	NA	NA
C	13/11/2016	pm	BT	8.997	unhulled	1.12	1	N	NA	NA
C	13/11/2016	pm	BT	8.997	unhulled	1.09	1	N	NA	NA
C	13/11/2016	pm	BT	8.997	unhulled	1.06	1	Y	CH	BT
C	13/11/2016	pm	BT	8.997	unhulled	3.14	3	N	NA	NA
C	13/11/2016	pm	BT	8.997	unhulled	2.01	2	N	NA	NA
C	13/11/2016	pm	BT	8.997	unhulled	1.97	2	N	NA	NA
C	13/11/2016	pm	BT	8.997	unhulled	0.98	1	N	NA	NA
C	13/11/2016	pm	BT	8.997	unhulled	0.98	1	N	NA	NA
C	13/11/2016	pm	BT	8.997	unhulled	1.75	2	N	NA	NA
C	13/11/2016	pm	BT	8.997	unhulled	2.47	3	N	NA	NA
C	13/11/2016	pm	BT	8.997	unhulled	0.56	1	N	NA	NA
C	13/11/2016	pm	BT	8.997	unhulled	3.47	NA	N	NA	NA
C	13/11/2016	pm	BT	8.997	unhulled	3.06	NA	N	NA	NA
C	13/11/2016	pm	BT	8.997	unhulled	8.84	NA	N	NA	NA
C	13/11/2016	pm	BT	8.997	unhulled	4.03	NA	N	NA	NA
C	13/11/2016	pm	CH	7.974	unhulled	15.36	5	N	NA	NA
C	13/11/2016	pm	CH	7.974	unhulled	19.4	8	N	NA	NA
C	13/11/2016	pm	CH	7.974	unhulled	2.32	1	N	NA	NA
C	13/11/2016	pm	CH	7.974	unhulled	6.66	3	Y	NH	CH
C	13/11/2016	pm	CH	7.974	unhulled	6.65	3	Y	NH	CH
C	13/11/2016	pm	CH	7.974	unhulled	8.56	4	Y	NH	CH
C	13/11/2016	pm	CH	7.974	unhulled	12.47	6	Y	GT	CH
C	13/11/2016	pm	CH	7.974	unhulled	1.98	1	N	NA	NA
C	13/11/2016	pm	CH	7.974	unhulled	1.75	1	Y	GT	CH
C	13/11/2016	pm	CH	7.974	unhulled	1.63	1	N	NA	NA
C	13/11/2016	pm	CH	7.974	unhulled	3.22	2	N	NA	NA
C	13/11/2016	pm	CH	7.974	unhulled	1.53	1	N	NA	NA
C	13/11/2016	pm	CH	7.974	unhulled	5.69	4	N	NA	NA
C	13/11/2016	pm	CH	7.974	unhulled	1.38	1	N	NA	NA
C	13/11/2016	pm	CH	7.974	unhulled	5.15	4	N	NA	NA
C	13/11/2016	pm	CH	7.974	unhulled	1.15	1	Y	NH	CH
C	13/11/2016	pm	CH	7.974	unhulled	1.09	1	N	NA	NA
C	13/11/2016	pm	CH	7.974	unhulled	2.16	2	N	NA	NA
C	13/11/2016	pm	CH	7.974	unhulled	2.5	3	Y	GT	CH
C	13/11/2016	pm	CH	7.974	unhulled	14.45	NA	Y	CH	BT
C	13/11/2016	pm	CH	7.974	unhulled	12.5	NA	Y	CH	GT
C	13/11/2016	pm	CH	7.974	unhulled	15.19	NA	N	NA	NA
C	13/11/2016	pm	CH	7.974	unhulled	3.21	NA	N	NA	NA
C	13/11/2016	pm	CH	7.974	unhulled	3.18	NA	N	NA	NA
C	13/11/2016	pm	CT	10	hulled	49.53	6	N	NA	NA
C	13/11/2016	pm	CT	10	hulled	9.03	5	N	NA	NA
C	13/11/2016	pm	CT	10	hulled	6.53	4	N	NA	NA
C	13/11/2016	pm	CT	10	hulled	3.03	2	N	NA	NA
C	13/11/2016	pm	CT	10	hulled	8.93	6	N	NA	NA
C	13/11/2016	pm	CT	10	hulled	7.03	5	N	NA	NA
C	13/11/2016	pm	CT	10	hulled	5.37	4	N	NA	NA
C	13/11/2016	pm	CT	10	hulled	8.86	7	N	NA	NA
C	13/11/2016	pm	CT	10	hulled	1.22	1	N	NA	NA
C	13/11/2016	pm	CT	10	hulled	1.22	1	N	NA	NA
C	13/11/2016	pm	CT	10	hulled	2.25	2	N	NA	NA
C	13/11/2016	pm	CT	10	hulled	3.86	4	N	NA	NA
C	13/11/2016	pm	CT	10	hulled	5.38	6	N	NA	NA
C	13/11/2016	pm	CT	10	hulled	5.35	6	N	NA	NA
C	13/11/2016	pm	CT	10	hulled	0.83	1	N	NA	NA
C	13/11/2016	pm	CT	10	hulled	2.4	3	N	NA	NA
C	13/11/2016	pm	CT	10	hulled	3.19	4	N	NA	NA
C	13/11/2016	pm	CT	10	hulled	1.31	2	N	NA	NA
C	13/11/2016	pm	CT	10	hulled	1.87	3	N	NA	NA
C	13/11/2016	pm	CT	10	unhulled	3.43	1	N	NA	NA
C	13/11/2016	pm	CT	10	unhulled	3.35	1	N	NA	NA
C	13/11/2016	pm	CT	10	unhulled	2.18	1	N	NA	NA
C	13/11/2016	pm	CT	10	unhulled	1.95	1	N	NA	NA
C	13/11/2016	pm	CT	10	unhulled	1.91	1	N	NA	NA
C	13/11/2016	pm	CT	10	unhulled	3.6	2	N	NA	NA
C	13/11/2016	pm	CT	10	unhulled	5.06	3	N	NA	NA
C	13/11/2016	pm	CT	10	unhulled	1.66	1	N	NA	NA
C	13/11/2016	pm	CT	10	unhulled	1.62	1	N	NA	NA
C	13/11/2016	pm	CT	10	unhulled	1.57	1	N	NA	NA
C	13/11/2016	pm	CT	10	unhulled	1.54	1	N	NA	NA
C	13/11/2016	pm	CT	10	unhulled	3	2	N	NA	NA
C	13/11/2016	pm	CT	10	unhulled	1.5	1	N	NA	NA
C	13/11/2016	pm	CT	10	unhulled	1.43	1	N	NA	NA
C	13/11/2016	pm	CT	10	unhulled	2.81	2	N	NA	NA
C	13/11/2016	pm	CT	10	unhulled	1.38	1	N	NA	NA
C	13/11/2016	pm	CT	10	unhulled	2.75	2	Y	BT	CT
C	13/11/2016	pm	CT	10	unhulled	1.37	1	N	NA	NA
C	13/11/2016	pm	CT	10	unhulled	1.37	1	N	NA	NA
C	13/11/2016	pm	CT	10	unhulled	1.37	1	N	NA	NA
C	13/11/2016	pm	CT	10	unhulled	1.34	1	N	NA	NA
C	13/11/2016	pm	CT	10	unhulled	7.91	6	N	NA	NA
C	13/11/2016	pm	CT	10	unhulled	1.13	1	N	NA	NA
C	13/11/2016	pm	CT	10	unhulled	3.38	3	N	NA	NA
C	13/11/2016	pm	CT	10	unhulled	1.12	1	N	NA	NA
C	13/11/2016	pm	CT	10	unhulled	1.06	1	N	NA	NA
C	13/11/2016	pm	CT	10	unhulled	1.05	1	N	NA	NA
C	13/11/2016	pm	CT	10	unhulled	1.03	1	N	NA	NA
C	13/11/2016	pm	CT	10	unhulled	1.03	1	N	NA	NA
C	13/11/2016	pm	CT	10	unhulled	2.05	2	N	NA	NA
C	13/11/2016	pm	CT	10	unhulled	1.02	1	N	NA	NA
C	13/11/2016	pm	CT	10	unhulled	2	2	N	NA	NA
C	13/11/2016	pm	CT	10	unhulled	1	1	N	NA	NA
C	13/11/2016	pm	CT	10	unhulled	1.96	2	N	NA	NA
C	13/11/2016	pm	CT	10	unhulled	0.98	1	N	NA	NA
C	13/11/2016	pm	CT	10	unhulled	0.97	1	N	NA	NA
C	13/11/2016	pm	CT	10	unhulled	0.95	1	N	NA	NA
C	13/11/2016	pm	CT	10	unhulled	0.94	1	N	NA	NA
C	13/11/2016	pm	CT	10	unhulled	0.93	1	N	NA	NA
C	13/11/2016	pm	CT	10	unhulled	0.91	1	Y	GT	CT
C	13/11/2016	pm	CT	10	unhulled	0.91	1	N	NA	NA
C	13/11/2016	pm	CT	10	unhulled	3.53	4	N	NA	NA
C	13/11/2016	pm	CT	10	unhulled	1.65	2	N	NA	NA
C	13/11/2016	pm	CT	10	unhulled	0.81	1	N	NA	NA
C	13/11/2016	pm	CT	10	unhulled	0.78	1	N	NA	NA
C	13/11/2016	pm	CT	10	unhulled	3.51	5	N	NA	NA
C	13/11/2016	pm	CT	10	unhulled	0.68	1	N	NA	NA
C	13/11/2016	pm	CT	10	unhulled	1.97	3	N	NA	NA
C	13/11/2016	pm	CT	10	unhulled	0.63	1	N	NA	NA
C	13/11/2016	pm	CT	10	unhulled	0.59	1	N	NA	NA
C	13/11/2016	pm	CT	10	unhulled	0.91	2	N	NA	NA
C	13/11/2016	pm	CT	10	unhulled	0.36	1	Y	GT	CT
C	13/11/2016	pm	CT	10	unhulled	0.21	NA	Y	NH	CT
C	13/11/2016	pm	CT	10	unhulled	3.9	NA	N	NA	NA
C	13/11/2016	pm	CT	10	unhulled	2.13	NA	N	NA	NA
C	13/11/2016	pm	CT	10	unhulled	1.12	NA	N	NA	NA
C	13/11/2016	pm	CT	10	unhulled	NA	NA	N	NA	NA
C	13/11/2016	pm	GT	6.02	hulled	1.83	1	N	NA	NA
C	13/11/2016	pm	GT	6.02	hulled	7.21	4	N	NA	NA
C	13/11/2016	pm	GT	6.02	hulled	1.63	1	N	NA	NA
C	13/11/2016	pm	GT	6.02	hulled	3.25	4	N	NA	NA
C	13/11/2016	pm	GT	6.02	hulled	3.03	4	N	NA	NA
C	13/11/2016	pm	GT	6.02	unhulled	0.95	0	N	NA	NA
C	13/11/2016	pm	GT	6.02	unhulled	6.31	1	N	NA	NA
C	13/11/2016	pm	GT	6.02	unhulled	3.52	1	N	NA	NA
C	13/11/2016	pm	GT	6.02	unhulled	10.37	4	N	NA	NA
C	13/11/2016	pm	GT	6.02	unhulled	2.47	1	N	NA	NA
C	13/11/2016	pm	GT	6.02	unhulled	2.34	1	N	NA	NA
C	13/11/2016	pm	GT	6.02	unhulled	2.33	1	N	NA	NA
C	13/11/2016	pm	GT	6.02	unhulled	4.62	2	N	NA	NA
C	13/11/2016	pm	GT	6.02	unhulled	6.75	3	N	NA	NA
C	13/11/2016	pm	GT	6.02	unhulled	2.19	1	Y	GT	CH
C	13/11/2016	pm	GT	6.02	unhulled	4.18	2	N	NA	NA
C	13/11/2016	pm	GT	6.02	unhulled	5.41	3	N	NA	NA
C	13/11/2016	pm	GT	6.02	unhulled	1.79	1	N	NA	NA
C	13/11/2016	pm	GT	6.02	unhulled	1.75	1	N	NA	NA
C	13/11/2016	pm	GT	6.02	unhulled	1.75	1	N	NA	NA
C	13/11/2016	pm	GT	6.02	unhulled	1.72	1	N	NA	NA
C	13/11/2016	pm	GT	6.02	unhulled	1.72	1	N	NA	NA
C	13/11/2016	pm	GT	6.02	unhulled	1.66	1	N	NA	NA
C	13/11/2016	pm	GT	6.02	unhulled	3.28	2	N	NA	NA
C	13/11/2016	pm	GT	6.02	unhulled	6.47	4	N	NA	NA
C	13/11/2016	pm	GT	6.02	unhulled	1.59	1	N	NA	NA
C	13/11/2016	pm	GT	6.02	unhulled	3.12	2	Y	GT	BT
C	13/11/2016	pm	GT	6.02	unhulled	3.12	2	N	NA	NA
C	13/11/2016	pm	GT	6.02	unhulled	4.66	3	N	NA	NA
C	13/11/2016	pm	GT	6.02	unhulled	1.53	1	N	NA	NA
C	13/11/2016	pm	GT	6.02	unhulled	18.03	12	N	NA	NA
C	13/11/2016	pm	GT	6.02	unhulled	1.5	1	N	NA	NA
C	13/11/2016	pm	GT	6.02	unhulled	4.45	3	N	NA	NA
C	13/11/2016	pm	GT	6.02	unhulled	1.47	1	N	NA	NA
C	13/11/2016	pm	GT	6.02	unhulled	1.47	1	N	NA	NA
C	13/11/2016	pm	GT	6.02	unhulled	2.91	2	N	NA	NA
C	13/11/2016	pm	GT	6.02	unhulled	1.44	1	N	NA	NA
C	13/11/2016	pm	GT	6.02	unhulled	1.41	1	N	NA	NA
C	13/11/2016	pm	GT	6.02	unhulled	2.81	2	N	NA	NA
C	13/11/2016	pm	GT	6.02	unhulled	1.4	1	N	NA	NA
C	13/11/2016	pm	GT	6.02	unhulled	1.4	1	N	NA	NA
C	13/11/2016	pm	GT	6.02	unhulled	2.75	2	N	NA	NA
C	13/11/2016	pm	GT	6.02	unhulled	2.72	2	N	NA	NA
C	13/11/2016	pm	GT	6.02	unhulled	4.06	3	N	NA	NA
C	13/11/2016	pm	GT	6.02	unhulled	5.25	4	N	NA	NA
C	13/11/2016	pm	GT	6.02	unhulled	1.31	1	N	NA	NA
C	13/11/2016	pm	GT	6.02	unhulled	2.56	2	Y	NH	GT
C	13/11/2016	pm	GT	6.02	unhulled	3.78	3	N	NA	NA
C	13/11/2016	pm	GT	6.02	unhulled	3.75	3	N	NA	NA
C	13/11/2016	pm	GT	6.02	unhulled	1.25	1	N	NA	NA
C	13/11/2016	pm	GT	6.02	unhulled	1.22	1	N	NA	NA
C	13/11/2016	pm	GT	6.02	unhulled	1.21	1	N	NA	NA
C	13/11/2016	pm	GT	6.02	unhulled	2.41	2	N	NA	NA
C	13/11/2016	pm	GT	6.02	unhulled	1.18	1	N	NA	NA
C	13/11/2016	pm	GT	6.02	unhulled	2.31	2	N	NA	NA
C	13/11/2016	pm	GT	6.02	unhulled	2.28	2	N	NA	NA
C	13/11/2016	pm	GT	6.02	unhulled	2.25	2	N	NA	NA
C	13/11/2016	pm	GT	6.02	unhulled	4.45	4	N	NA	NA
C	13/11/2016	pm	GT	6.02	unhulled	2.19	2	N	NA	NA
C	13/11/2016	pm	GT	6.02	unhulled	3.26	3	N	NA	NA
C	13/11/2016	pm	GT	6.02	unhulled	1.08	1	N	NA	NA
C	13/11/2016	pm	GT	6.02	unhulled	3.16	3	N	NA	NA
C	13/11/2016	pm	GT	6.02	unhulled	3.07	3	N	NA	NA
C	13/11/2016	pm	GT	6.02	unhulled	6.09	6	N	NA	NA
C	13/11/2016	pm	GT	6.02	unhulled	1	1	N	NA	NA
C	13/11/2016	pm	GT	6.02	unhulled	1.97	2	N	NA	NA
C	13/11/2016	pm	GT	6.02	unhulled	5.87	6	N	NA	NA
C	13/11/2016	pm	GT	6.02	unhulled	1.91	2	N	NA	NA
C	13/11/2016	pm	GT	6.02	unhulled	5.69	6	N	NA	NA
C	13/11/2016	pm	GT	6.02	unhulled	3.75	4	N	NA	NA
C	13/11/2016	pm	GT	6.02	unhulled	2.68	3	N	NA	NA
C	13/11/2016	pm	GT	6.02	unhulled	2.56	3	N	NA	NA
C	13/11/2016	pm	GT	6.02	unhulled	1.56	2	N	NA	NA
C	13/11/2016	pm	GT	6.02	unhulled	3.09	4	N	NA	NA
C	13/11/2016	pm	GT	6.02	unhulled	0.71	1	N	NA	NA
C	13/11/2016	pm	GT	6.02	unhulled	2.12	3	N	NA	NA
C	13/11/2016	pm	GT	6.02	unhulled	2.08	3	N	NA	NA
C	13/11/2016	pm	GT	6.02	unhulled	3.1	5	N	NA	NA
C	13/11/2016	pm	GT	6.02	unhulled	2.35	4	N	NA	NA
C	13/11/2016	pm	GT	6.02	unhulled	1.16	2	N	NA	NA
C	13/11/2016	pm	GT	6.02	unhulled	NA	NA	N	NA	NA
C	13/11/2016	pm	GT	6.02	unhulled	5.46	NA	Y	GT	CH
C	13/11/2016	pm	GT	6.02	unhulled	5.47	NA	Y	GT	CT
C	13/11/2016	pm	GT	6.02	unhulled	6.75	NA	N	NA	NA
C	13/11/2016	pm	GT	6.02	unhulled	6.23	NA	N	NA	NA
C	13/11/2016	pm	GT	6.02	unhulled	5.78	NA	N	NA	NA
C	13/11/2016	pm	GT	6.02	unhulled	3.12	NA	N	NA	NA
C	13/11/2016	pm	GT	6.02	unhulled	2.53	NA	N	NA	NA
C	13/11/2016	pm	GR	2.115	unhulled	NA	NA	Y	GR	CH
C	13/11/2016	pm	GR	2.115	unhulled	177.1	NA	N	NA	NA
C	13/11/2016	pm	HS	1.044	unhulled	11.18	5	N	NA	NA
C	13/11/2016	pm	NH	2.998	hulled	14.86	8	N	NA	NA
C	13/11/2016	pm	NH	2.998	hulled	22.53	26	N	NA	NA
C	13/11/2016	pm	NH	2.998	hulled	NA	NA	N	NA	NA
C	13/11/2016	pm	NH	2.998	unhulled	15.56	6	N	NA	NA
C	13/11/2016	pm	NH	2.998	unhulled	25.62	12	N	NA	NA
C	13/11/2016	pm	NH	2.998	unhulled	7.47	4	N	NA	NA
C	13/11/2016	pm	NH	2.998	unhulled	29.24	16	N	NA	NA
C	13/11/2016	pm	NH	2.998	unhulled	3.59	2	N	NA	NA
C	13/11/2016	pm	NH	2.998	unhulled	5.25	3	N	NA	NA
C	13/11/2016	pm	NH	2.998	unhulled	40.68	24	N	NA	NA
C	13/11/2016	pm	NH	2.998	unhulled	9.83	6	N	NA	NA
C	13/11/2016	pm	NH	2.998	unhulled	7.82	5	Y	NH	GT
C	13/11/2016	pm	NH	2.998	unhulled	4.53	3	N	NA	NA
C	13/11/2016	pm	NH	2.998	unhulled	25.28	17	N	NA	NA
C	13/11/2016	pm	NH	2.998	unhulled	7.32	5	N	NA	NA
C	13/11/2016	pm	NH	2.998	unhulled	4.38	3	N	NA	NA
C	13/11/2016	pm	NH	2.998	unhulled	5.3	4	N	NA	NA
C	13/11/2016	pm	NH	2.998	unhulled	9.1	8	N	NA	NA
C	13/11/2016	pm	NH	2.998	unhulled	62.72	58	N	NA	NA
C	13/11/2016	pm	NH	2.998	unhulled	4.13	4	N	NA	NA
C	13/11/2016	pm	NH	2.998	unhulled	6.03	6	N	NA	NA
C	13/11/2016	pm	NH	2.998	unhulled	12.65	13	N	NA	NA
C	13/11/2016	pm	NH	2.998	unhulled	2.86	3	Y	NH	CH
C	13/11/2016	pm	NH	2.998	unhulled	NA	NA	Y	NH	BT
C	13/11/2016	pm	NH	2.998	unhulled	NA	NA	Y	NH	BT
C	13/11/2016	pm	NH	2.998	unhulled	17.91	NA	Y	NH	BT
C	13/11/2016	pm	NH	2.998	unhulled	4.56	NA	Y	NH	BT
C	13/11/2016	pm	NH	2.998	unhulled	15	NA	N	NA	NA
C	13/11/2016	pm	NH	2.998	unhulled	14.23	NA	N	NA	NA
C	13/11/2016	pm	NH	2.998	unhulled	13.76	NA	N	NA	NA
C	13/11/2016	pm	NH	2.998	unhulled	7.44	NA	N	NA	NA
C	13/11/2016	pm	NH	2.998	unhulled	6.5	NA	N	NA	NA
C	13/11/2016	pm	NH	2.998	unhulled	3.35	NA	N	NA	NA
C	13/11/2016	pm	NH	2.998	unhulled	2.28	NA	N	NA	NA
C	13/11/2016	pm	R.	3.942	unhulled	1.25	0	N	NA	NA
C	13/11/2016	pm	R.	3.942	unhulled	1.87	1	N	NA	NA
C	13/11/2016	pm	R.	3.942	unhulled	2.03	2	N	NA	NA
C	13/11/2016	pm	R.	3.942	unhulled	2.01	2	N	NA	NA
C	13/11/2016	pm	R.	3.942	unhulled	1.47	2	N	NA	NA
C	13/11/2016	pm	R.	3.942	unhulled	0.72	1	N	NA	NA
C	13/11/2016	pm	R.	3.942	unhulled	1.34	2	N	NA	NA
C	14/11/2016	am	BT	8.997	hulled	3.09	2	N	NA	NA
C	14/11/2016	am	BT	8.997	hulled	3	2	N	NA	NA
C	14/11/2016	am	BT	8.997	hulled	4.29	3	N	NA	NA
C	14/11/2016	am	BT	8.997	hulled	1.22	1	N	NA	NA
C	14/11/2016	am	BT	8.997	hulled	1.16	1	N	NA	NA
C	14/11/2016	am	BT	8.997	hulled	1.1	1	N	NA	NA
C	14/11/2016	am	BT	8.997	hulled	3.12	3	N	NA	NA
C	14/11/2016	am	BT	8.997	hulled	3.06	3	N	NA	NA
C	14/11/2016	am	BT	8.997	hulled	1.22	2	N	NA	NA
C	14/11/2016	am	BT	8.997	hulled	8.44	NA	N	NA	NA
C	14/11/2016	am	BT	8.997	hulled	4.41	NA	N	NA	NA
C	14/11/2016	am	BT	8.997	hulled	3.31	NA	N	NA	NA
C	14/11/2016	am	BT	8.997	hulled	3.03	NA	N	NA	NA
C	14/11/2016	am	BT	8.997	hulled	1.9	NA	N	NA	NA
C	14/11/2016	am	BT	8.997	hulled	1.22	NA	N	NA	NA
C	14/11/2016	am	BT	8.997	unhulled	1.06	1	N	NA	NA
C	14/11/2016	am	BT	8.997	unhulled	0.94	1	N	NA	NA
C	14/11/2016	am	BT	8.997	unhulled	0.9	1	N	NA	NA
C	14/11/2016	am	BT	8.997	unhulled	2.19	3	N	NA	NA
C	14/11/2016	am	CH	7.974	hulled	1.81	1	N	NA	NA
C	14/11/2016	am	CH	7.974	hulled	2.22	2	N	NA	NA
C	14/11/2016	am	CH	7.974	hulled	1.06	1	Y	GT	CH
C	14/11/2016	am	CH	7.974	hulled	1.57	3	N	NA	NA
C	14/11/2016	am	CH	7.974	hulled	NA	NA	Y	GT	CH
C	14/11/2016	am	CH	7.974	hulled	1.72	NA	Y	CT	CH
C	14/11/2016	am	CH	7.974	hulled	7.5	6	N	NA	NA
C	14/11/2016	am	CH	7.974	hulled	2.2	NA	N	NA	NA
C	14/11/2016	am	CH	7.974	hulled	2.1	NA	N	NA	NA
C	14/11/2016	am	CH	7.974	hulled	4.69	NA	N	NA	NA
C	14/11/2016	am	CH	7.974	unhulled	8.85	2	Y	GT	CH
C	14/11/2016	am	CH	7.974	unhulled	2.31	2	N	NA	NA
C	14/11/2016	am	CT	10	hulled	1.97	1	Y	NH	CT
C	14/11/2016	am	CT	10	hulled	1.94	1	N	NA	NA
C	14/11/2016	am	CT	10	hulled	1.59	1	N	NA	NA
C	14/11/2016	am	CT	10	hulled	1.37	1	N	NA	NA
C	14/11/2016	am	CT	10	hulled	4.06	3	N	NA	NA
C	14/11/2016	am	CT	10	hulled	1.31	1	N	NA	NA
C	14/11/2016	am	CT	10	hulled	2.19	2	N	NA	NA
C	14/11/2016	am	CT	10	hulled	4.18	4	N	NA	NA
C	14/11/2016	am	CT	10	hulled	6.12	6	N	NA	NA
C	14/11/2016	am	CT	10	hulled	4.97	5	N	NA	NA
C	14/11/2016	am	CT	10	hulled	1.97	2	N	NA	NA
C	14/11/2016	am	CT	10	hulled	3.68	4	N	NA	NA
C	14/11/2016	am	CT	10	hulled	2.75	3	N	NA	NA
C	14/11/2016	am	CT	10	hulled	3.66	4	N	NA	NA
C	14/11/2016	am	CT	10	hulled	12.78	14	N	NA	NA
C	14/11/2016	am	CT	10	hulled	1.72	2	N	NA	NA
C	14/11/2016	am	CT	10	hulled	2.57	3	N	NA	NA
C	14/11/2016	am	CT	10	hulled	0.81	1	N	NA	NA
C	14/11/2016	am	CT	10	hulled	1.53	2	N	NA	NA
C	14/11/2016	am	CT	10	hulled	1.37	2	N	NA	NA
C	14/11/2016	am	CT	10	hulled	0.65	1	N	NA	NA
C	14/11/2016	am	CT	10	hulled	0.6	1	Y	NH	CT
C	14/11/2016	am	CT	10	hulled	4.66	NA	N	NA	NA
C	14/11/2016	am	CT	10	hulled	3.28	NA	N	NA	NA
C	14/11/2016	am	CT	10	hulled	3.14	NA	N	NA	NA
C	14/11/2016	am	CT	10	hulled	NA	NA	Y	CT	CH
C	14/11/2016	am	CT	10	unhulled	2.93	2	N	NA	NA
C	14/11/2016	am	CT	10	unhulled	1.32	1	N	NA	NA
C	14/11/2016	am	CT	10	unhulled	1.25	1	N	NA	NA
C	14/11/2016	am	CT	10	unhulled	0.88	1	N	NA	NA
C	14/11/2016	am	CT	10	unhulled	0.84	1	N	NA	NA
C	14/11/2016	am	CT	10	unhulled	0.81	1	N	NA	NA
C	14/11/2016	am	CT	10	unhulled	0.81	1	N	NA	NA
C	14/11/2016	am	CT	10	unhulled	1.6	2	N	NA	NA
C	14/11/2016	am	CT	10	unhulled	3.1	4	N	NA	NA
C	14/11/2016	am	CT	10	unhulled	0.73	1	N	NA	NA
C	14/11/2016	am	CT	10	unhulled	0.63	1	N	NA	NA
C	14/11/2016	am	CT	10	unhulled	0.56	1	N	NA	NA
C	14/11/2016	am	CT	10	unhulled	0.55	1	N	NA	NA
C	14/11/2016	am	CT	10	unhulled	0.32	1	N	NA	NA
C	14/11/2016	am	CT	10	unhulled	4.7	NA	N	NA	NA
C	14/11/2016	am	CT	10	unhulled	1.78	NA	N	NA	NA
C	14/11/2016	am	CT	10	unhulled	1.19	NA	N	NA	NA
C	14/11/2016	am	GT	6.02	hulled	2.16	1	N	NA	NA
C	14/11/2016	am	GT	6.02	hulled	3.82	2	N	NA	NA
C	14/11/2016	am	GT	6.02	hulled	5.47	3	N	NA	NA
C	14/11/2016	am	GT	6.02	hulled	3.43	2	N	NA	NA
C	14/11/2016	am	GT	6.02	hulled	1.44	1	N	NA	NA
C	14/11/2016	am	GT	6.02	hulled	8.41	6	N	NA	NA
C	14/11/2016	am	GT	6.02	hulled	1.28	1	N	NA	NA
C	14/11/2016	am	GT	6.02	hulled	2.28	2	N	NA	NA
C	14/11/2016	am	GT	6.02	hulled	2.16	2	Y	R.	GT
C	14/11/2016	am	GT	6.02	hulled	6.09	6	N	NA	NA
C	14/11/2016	am	GT	6.02	hulled	3.88	4	N	NA	NA
C	14/11/2016	am	GT	6.02	hulled	0.84	1	Y	R.	GT
C	14/11/2016	am	GT	6.02	hulled	0.81	1	Y	R.	GT
C	14/11/2016	am	GT	6.02	hulled	6.06	NA	N	NA	NA
C	14/11/2016	am	GT	6.02	hulled	2.44	NA	N	NA	NA
C	14/11/2016	am	GT	6.02	unhulled	1.36	1	N	NA	NA
C	14/11/2016	am	GT	6.02	unhulled	1.09	1	N	NA	NA
C	14/11/2016	am	GT	6.02	unhulled	5.09	5	N	NA	NA
C	14/11/2016	am	GT	6.02	unhulled	1.78	2	N	NA	NA
C	14/11/2016	am	GT	6.02	unhulled	1.66	2	N	NA	NA
C	14/11/2016	am	GT	6.02	unhulled	0.81	1	N	NA	NA
C	14/11/2016	am	GT	6.02	unhulled	2.19	3	N	NA	NA
C	14/11/2016	am	GT	6.02	unhulled	0.63	1	N	NA	NA
C	14/11/2016	am	GT	6.02	unhulled	1.19	2	N	NA	NA
C	14/11/2016	am	NH	2.998	hulled	26.34	9	N	NA	NA
C	14/11/2016	am	NH	2.998	hulled	21.34	11	N	NA	NA
C	14/11/2016	am	NH	2.998	hulled	39.16	24	N	NA	NA
C	14/11/2016	am	NH	2.998	hulled	13.28	17	N	NA	NA
C	14/11/2016	am	NH	2.998	hulled	164.8	NA	Y	NH	CT
C	14/11/2016	am	NH	2.998	hulled	5.35	NA	Y	NH	CT
C	14/11/2016	am	NH	2.998	hulled	21.21	NA	N	NA	NA
C	14/11/2016	am	NH	2.998	hulled	8.28	NA	N	NA	NA
C	14/11/2016	am	NH	2.998	hulled	7.47	NA	N	NA	NA
C	14/11/2016	am	NH	2.998	hulled	7.44	NA	N	NA	NA
C	14/11/2016	am	NH	2.998	unhulled	11.94	NA	N	NA	NA
C	14/11/2016	am	R.	3.942	hulled	0.67	1	Y	R.	GT
C	14/11/2016	am	R.	3.942	hulled	1.04	2	N	NA	NA
C	14/11/2016	am	R.	3.942	hulled	1.54	3	N	NA	NA
C	14/11/2016	am	R.	3.942	unhulled	0.84	1	N	NA	NA
C	14/11/2016	am	R.	3.942	unhulled	1.47	2	N	NA	NA
C	14/11/2016	am	R.	3.942	unhulled	0.72	1	N	NA	NA
C	14/11/2016	am	R.	3.942	unhulled	1.25	2	N	NA	NA
C	14/11/2016	am	R.	3.942	unhulled	1.72	3	N	NA	NA
C	14/11/2016	am	R.	3.942	unhulled	2.66	5	N	NA	NA
C	14/11/2016	am	R.	3.942	unhulled	0.53	1	N	NA	NA
C	14/11/2016	am	R.	3.942	unhulled	0.5	1	N	NA	NA
C	14/11/2016	am	R.	3.942	unhulled	1.47	3	N	NA	NA
C	14/11/2016	am	R.	3.942	unhulled	0.37	1	N	NA	NA
C	14/11/2016	am	R.	3.942	unhulled	0.25	1	N	NA	NA
A	15/11/2016	am	BT	8.997	hulled	2	1	N	NA	NA
A	15/11/2016	am	BT	8.997	hulled	6.78	4	N	NA	NA
A	15/11/2016	am	BT	8.997	hulled	6.78	4	N	NA	NA
A	15/11/2016	am	BT	8.997	hulled	3.28	2	N	NA	NA
A	15/11/2016	am	BT	8.997	hulled	1.85	2	N	NA	NA
A	15/11/2016	am	BT	8.997	hulled	9.34	NA	N	NA	NA
A	15/11/2016	am	BT	8.997	hulled	6.12	NA	N	NA	NA
A	15/11/2016	am	BT	8.997	hulled	NA	NA	N	NA	NA
A	15/11/2016	am	BT	8.997	unhulled	3.22	1	N	NA	NA
A	15/11/2016	am	BT	8.997	unhulled	3.22	1	N	NA	NA
A	15/11/2016	am	BT	8.997	unhulled	6.32	2	N	NA	NA
A	15/11/2016	am	BT	8.997	unhulled	2.66	1	N	NA	NA
A	15/11/2016	am	BT	8.997	unhulled	2.56	1	N	NA	NA
A	15/11/2016	am	BT	8.997	unhulled	2.5	1	N	NA	NA
A	15/11/2016	am	BT	8.997	unhulled	2.5	1	N	NA	NA
A	15/11/2016	am	BT	8.997	unhulled	2.47	1	N	NA	NA
A	15/11/2016	am	BT	8.997	unhulled	24.88	11	N	NA	NA
A	15/11/2016	am	BT	8.997	unhulled	2.06	1	N	NA	NA
A	15/11/2016	am	BT	8.997	unhulled	3.97	2	N	NA	NA
A	15/11/2016	am	BT	8.997	unhulled	3.97	2	N	NA	NA
A	15/11/2016	am	BT	8.997	unhulled	1.97	1	N	NA	NA
A	15/11/2016	am	BT	8.997	unhulled	1.75	1	N	NA	NA
A	15/11/2016	am	BT	8.997	unhulled	1.66	1	N	NA	NA
A	15/11/2016	am	BT	8.997	unhulled	1.53	1	N	NA	NA
A	15/11/2016	am	BT	8.997	unhulled	1.44	1	N	NA	NA
A	15/11/2016	am	BT	8.997	unhulled	1.41	1	N	NA	NA
A	15/11/2016	am	BT	8.997	unhulled	1.41	1	N	NA	NA
A	15/11/2016	am	BT	8.997	unhulled	1.38	1	N	NA	NA
A	15/11/2016	am	BT	8.997	unhulled	1.33	1	N	NA	NA
A	15/11/2016	am	BT	8.997	unhulled	1.31	1	N	NA	NA
A	15/11/2016	am	BT	8.997	unhulled	1.28	1	N	NA	NA
A	15/11/2016	am	BT	8.997	unhulled	2.47	2	N	NA	NA
A	15/11/2016	am	BT	8.997	unhulled	1.22	1	N	NA	NA
A	15/11/2016	am	BT	8.997	unhulled	1.22	1	N	NA	NA
A	15/11/2016	am	BT	8.997	unhulled	1.19	1	N	NA	NA
A	15/11/2016	am	BT	8.997	unhulled	1.19	1	N	NA	NA
A	15/11/2016	am	BT	8.997	unhulled	1.15	1	N	NA	NA
A	15/11/2016	am	BT	8.997	unhulled	3.41	3	N	NA	NA
A	15/11/2016	am	BT	8.997	unhulled	2.22	2	N	NA	NA
A	15/11/2016	am	BT	8.997	unhulled	1.06	1	N	NA	NA
A	15/11/2016	am	BT	8.997	unhulled	1.06	1	N	NA	NA
A	15/11/2016	am	BT	8.997	unhulled	2.1	2	N	NA	NA
A	15/11/2016	am	BT	8.997	unhulled	1.03	1	N	NA	NA
A	15/11/2016	am	BT	8.997	unhulled	2.04	2	N	NA	NA
A	15/11/2016	am	BT	8.997	unhulled	1	1	N	NA	NA
A	15/11/2016	am	BT	8.997	unhulled	1	1	N	NA	NA
A	15/11/2016	am	BT	8.997	unhulled	0.94	1	N	NA	NA
A	15/11/2016	am	BT	8.997	unhulled	0.93	1	N	NA	NA
A	15/11/2016	am	BT	8.997	unhulled	0.93	1	N	NA	NA
A	15/11/2016	am	BT	8.997	unhulled	0.84	1	N	NA	NA
A	15/11/2016	am	BT	8.997	unhulled	0.81	1	N	NA	NA
A	15/11/2016	am	BT	8.997	unhulled	0.81	1	N	NA	NA
A	15/11/2016	am	BT	8.997	unhulled	1.6	2	N	NA	NA
A	15/11/2016	am	BT	8.997	unhulled	1.6	2	N	NA	NA
A	15/11/2016	am	BT	8.997	unhulled	2.37	3	N	NA	NA
A	15/11/2016	am	BT	8.997	unhulled	1.53	2	N	NA	NA
A	15/11/2016	am	BT	8.997	unhulled	1.53	2	N	NA	NA
A	15/11/2016	am	BT	8.997	unhulled	0.75	1	N	NA	NA
A	15/11/2016	am	BT	8.997	unhulled	0.75	1	N	NA	NA
A	15/11/2016	am	BT	8.997	unhulled	1.28	2	N	NA	NA
A	15/11/2016	am	BT	8.997	unhulled	1.04	2	N	NA	NA
A	15/11/2016	am	BT	8.997	unhulled	0.52	1	N	NA	NA
A	15/11/2016	am	BT	8.997	unhulled	1	2	N	NA	NA
A	15/11/2016	am	BT	8.997	unhulled	1.78	NA	N	NA	NA
A	15/11/2016	am	BT	8.997	unhulled	1.53	NA	N	NA	NA
A	15/11/2016	am	CH	7.974	hulled	0.75	1	N	NA	NA
A	15/11/2016	am	CH	7.974	hulled	0.75	1	N	NA	NA
A	15/11/2016	am	CH	7.974	hulled	0.97	2	N	NA	NA
A	15/11/2016	am	CH	7.974	unhulled	14.78	4	N	NA	NA
A	15/11/2016	am	CH	7.974	unhulled	2.39	1	N	NA	NA
A	15/11/2016	am	CH	7.974	unhulled	2.39	1	N	NA	NA
A	15/11/2016	am	CH	7.974	unhulled	6.34	3	N	NA	NA
A	15/11/2016	am	CH	7.974	unhulled	3.9	2	N	NA	NA
A	15/11/2016	am	CH	7.974	unhulled	1.94	1	N	NA	NA
A	15/11/2016	am	CH	7.974	unhulled	1.84	1	N	NA	NA
A	15/11/2016	am	CH	7.974	unhulled	1.5	1	N	NA	NA
A	15/11/2016	am	CH	7.974	unhulled	1.5	1	N	NA	NA
A	15/11/2016	am	CH	7.974	unhulled	4.29	3	N	NA	NA
A	15/11/2016	am	CH	7.974	unhulled	4.29	3	N	NA	NA
A	15/11/2016	am	CH	7.974	unhulled	5.22	4	Y	BT	CH
A	15/11/2016	am	CH	7.974	unhulled	5.22	4	Y	BT	CH
A	15/11/2016	am	CH	7.974	unhulled	1.19	1	N	NA	NA
A	15/11/2016	am	CH	7.974	unhulled	1.09	1	N	NA	NA
A	15/11/2016	am	CH	7.974	unhulled	1.09	1	N	NA	NA
A	15/11/2016	am	CH	7.974	unhulled	1.06	1	N	NA	NA
A	15/11/2016	am	CH	7.974	unhulled	1.94	2	N	NA	NA
A	15/11/2016	am	CH	7.974	unhulled	1.94	2	N	NA	NA
A	15/11/2016	am	CH	7.974	unhulled	1.94	2	N	NA	NA
A	15/11/2016	am	CH	7.974	unhulled	0.94	1	N	NA	NA
A	15/11/2016	am	CH	7.974	unhulled	0.94	1	N	NA	NA
A	15/11/2016	am	CH	7.974	unhulled	0.91	1	N	NA	NA
A	15/11/2016	am	CH	7.974	unhulled	0.91	1	N	NA	NA
A	15/11/2016	am	CH	7.974	unhulled	1.78	2	N	NA	NA
A	15/11/2016	am	CH	7.974	unhulled	1.78	2	N	NA	NA
A	15/11/2016	am	CH	7.974	unhulled	1.75	2	N	NA	NA
A	15/11/2016	am	CH	7.974	unhulled	0.69	1	N	NA	NA
A	15/11/2016	am	CH	7.974	unhulled	0.69	1	N	NA	NA
A	15/11/2016	am	CH	7.974	unhulled	0.66	1	N	NA	NA
A	15/11/2016	am	CH	7.974	unhulled	1.16	2	N	NA	NA
A	15/11/2016	am	CH	7.974	unhulled	0.53	1	N	NA	NA
A	15/11/2016	am	CH	7.974	unhulled	0.53	1	N	NA	NA
A	15/11/2016	am	CH	7.974	unhulled	0.5	1	N	NA	NA
A	15/11/2016	am	CH	7.974	unhulled	0.5	1	N	NA	NA
A	15/11/2016	am	CH	7.974	unhulled	0.48	1	N	NA	NA
A	15/11/2016	am	CH	7.974	unhulled	0.47	1	Y	HS	CH
A	15/11/2016	am	CH	7.974	unhulled	0.36	NA	N	NA	NA
A	15/11/2016	am	CH	7.974	unhulled	27.85	NA	N	NA	NA
A	15/11/2016	am	CH	7.974	unhulled	13.13	NA	N	NA	NA
A	15/11/2016	am	CT	10	hulled	6.44	4	N	NA	NA
A	15/11/2016	am	CT	10	hulled	6.44	4	N	NA	NA
A	15/11/2016	am	CT	10	unhulled	1.84	1	N	NA	NA
A	15/11/2016	am	CT	10	unhulled	1.84	1	N	NA	NA
A	15/11/2016	am	CT	10	unhulled	5.03	3	N	NA	NA
A	15/11/2016	am	CT	10	unhulled	3.31	2	N	NA	NA
A	15/11/2016	am	CT	10	unhulled	3.31	2	N	NA	NA
A	15/11/2016	am	CT	10	unhulled	1.31	1	N	NA	NA
A	15/11/2016	am	CT	10	unhulled	1.31	1	N	NA	NA
A	15/11/2016	am	CT	10	unhulled	0.87	2	N	NA	NA
A	15/11/2016	am	D.	6.533	unhulled	NA	NA	N	NA	NA
A	15/11/2016	am	GT	6.02	hulled	2.28	3	N	NA	NA
A	15/11/2016	am	GT	6.02	hulled	2.28	3	N	NA	NA
A	15/11/2016	am	GT	6.02	unhulled	3.87	2	N	NA	NA
A	15/11/2016	am	GT	6.02	unhulled	3.85	2	N	NA	NA
A	15/11/2016	am	GT	6.02	unhulled	3.44	2	N	NA	NA
A	15/11/2016	am	GT	6.02	unhulled	1.44	1	N	NA	NA
A	15/11/2016	am	GT	6.02	unhulled	1.34	1	N	NA	NA
A	15/11/2016	am	GT	6.02	unhulled	5.32	4	N	NA	NA
A	15/11/2016	am	GT	6.02	unhulled	2.62	2	N	NA	NA
A	15/11/2016	am	GT	6.02	unhulled	3.66	3	N	NA	NA
A	15/11/2016	am	GT	6.02	unhulled	1.21	1	N	NA	NA
A	15/11/2016	am	GT	6.02	unhulled	1.15	1	N	NA	NA
A	15/11/2016	am	GT	6.02	unhulled	3.28	3	N	NA	NA
A	15/11/2016	am	GT	6.02	unhulled	3.28	3	N	NA	NA
A	15/11/2016	am	GT	6.02	unhulled	2	2	N	NA	NA
A	15/11/2016	am	GT	6.02	unhulled	1.5	2	N	NA	NA
A	15/11/2016	am	GT	6.02	unhulled	3.37	NA	N	NA	NA
A	15/11/2016	am	HS	1.044	unhulled	8.5	2	N	NA	NA
A	15/11/2016	am	HS	1.044	unhulled	31.16	16	N	NA	NA
A	15/11/2016	am	HS	1.044	unhulled	49.5	27	N	NA	NA
A	15/11/2016	am	HS	1.044	unhulled	10.91	7	N	NA	NA
A	15/11/2016	am	HS	1.044	unhulled	2.81	2	N	NA	NA
A	15/11/2016	am	HS	1.044	unhulled	18.94	15	N	NA	NA
A	15/11/2016	am	HS	1.044	unhulled	18.94	15	N	NA	NA
A	15/11/2016	am	HS	1.044	unhulled	4.28	4	N	NA	NA
A	15/11/2016	am	HS	1.044	unhulled	6.72	7	N	NA	NA
A	15/11/2016	am	HS	1.044	unhulled	2.28	3	N	NA	NA
A	15/11/2016	am	HS	1.044	unhulled	NA	NA	Y	HS	CH
A	15/11/2016	am	HS	1.044	unhulled	26.97	NA	N	NA	NA
A	15/11/2016	am	HS	1.044	unhulled	3.63	NA	N	NA	NA
A	15/11/2016	am	HS	1.044	unhulled	15.28	NA	N	NA	NA
A	15/11/2016	am	R.	3.942	unhulled	13	7	N	NA	NA
A	15/11/2016	am	R.	3.942	unhulled	0.37	1	N	NA	NA
C	15/11/2016	pm	GT	6.02	hulled	15.5	8	N	NA	NA
C	15/11/2016	pm	GT	6.02	hulled	4.59	3	N	NA	NA
C	15/11/2016	pm	GT	6.02	hulled	1.43	1	N	NA	NA
C	15/11/2016	pm	GT	6.02	hulled	4.62	6	N	NA	NA
C	15/11/2016	pm	GT	6.02	unhulled	2.22	0	N	NA	NA
C	15/11/2016	pm	GT	6.02	unhulled	0.91	1	N	NA	NA
C	15/11/2016	pm	GT	6.02	unhulled	0.9	1	N	NA	NA
C	15/11/2016	pm	GT	6.02	unhulled	1.75	2	N	NA	NA
C	15/11/2016	pm	GT	6.02	unhulled	0.85	1	N	NA	NA
C	15/11/2016	pm	GT	6.02	unhulled	2.31	3	N	NA	NA
C	15/11/2016	pm	GT	6.02	unhulled	1.31	2	N	NA	NA
C	15/11/2016	pm	NH	2.998	hulled	30.97	12	N	NA	NA
C	15/11/2016	pm	NH	2.998	hulled	15.06	9	N	NA	NA
C	15/11/2016	pm	NH	2.998	hulled	12	8	N	NA	NA
C	15/11/2016	pm	NH	2.998	hulled	131.39	NA	N	NA	NA
C	15/11/2016	pm	NH	2.998	hulled	72.5	NA	N	NA	NA
C	15/11/2016	pm	NH	2.998	hulled	35.04	NA	N	NA	NA
C	15/11/2016	pm	NH	2.998	unhulled	36.62	24	N	NA	NA
C	15/11/2016	pm	NH	2.998	unhulled	NA	NA	Y	NH	CH
C	15/11/2016	pm	NH	2.998	unhulled	50.09	NA	Y	NH	CH
C	15/11/2016	pm	R.	3.942	unhulled	2.32	3	N	NA	NA
C	15/11/2016	pm	R.	3.942	unhulled	0.69	1	N	NA	NA
B	16/11/2016	am	BT	8.997	hulled	1.78	1	N	NA	NA
B	16/11/2016	am	BT	8.997	unhulled	2	1	N	NA	NA
B	16/11/2016	am	BT	8.997	unhulled	3.67	2	N	NA	NA
B	16/11/2016	am	BT	8.997	unhulled	1.78	1	N	NA	NA
B	16/11/2016	am	BT	8.997	unhulled	1.78	1	N	NA	NA
B	16/11/2016	am	BT	8.997	unhulled	3.09	2	N	NA	NA
B	16/11/2016	am	BT	8.997	unhulled	1.5	1	N	NA	NA
B	16/11/2016	am	BT	8.997	unhulled	4.47	3	N	NA	NA
B	16/11/2016	am	BT	8.997	unhulled	1.44	1	N	NA	NA
B	16/11/2016	am	BT	8.997	unhulled	1.41	1	N	NA	NA
B	16/11/2016	am	BT	8.997	unhulled	1.41	1	N	NA	NA
B	16/11/2016	am	BT	8.997	unhulled	1.34	1	N	NA	NA
B	16/11/2016	am	BT	8.997	unhulled	1.32	1	N	NA	NA
B	16/11/2016	am	BT	8.997	unhulled	2.47	2	N	NA	NA
B	16/11/2016	am	BT	8.997	unhulled	1.15	1	N	NA	NA
B	16/11/2016	am	BT	8.997	unhulled	1.13	1	N	NA	NA
B	16/11/2016	am	BT	8.997	unhulled	1.09	1	N	NA	NA
B	16/11/2016	am	BT	8.997	unhulled	1.09	1	N	NA	NA
B	16/11/2016	am	BT	8.997	unhulled	0.87	1	N	NA	NA
B	16/11/2016	am	BT	8.997	unhulled	3.38	4	N	NA	NA
B	16/11/2016	am	BT	8.997	unhulled	1.66	2	N	NA	NA
B	16/11/2016	am	BT	8.997	unhulled	3.19	4	N	NA	NA
B	16/11/2016	am	BT	8.997	unhulled	1.4	2	N	NA	NA
B	16/11/2016	am	BT	8.997	unhulled	1.37	2	N	NA	NA
B	16/11/2016	am	BT	8.997	unhulled	0.67	1	N	NA	NA
B	16/11/2016	am	BT	8.997	unhulled	1.25	2	N	NA	NA
B	16/11/2016	am	BT	8.997	unhulled	0.53	1	N	NA	NA
B	16/11/2016	am	BT	8.997	unhulled	1.04	2	N	NA	NA
B	16/11/2016	am	BT	8.997	unhulled	1	2	N	NA	NA
B	16/11/2016	am	BT	8.997	unhulled	2.41	NA	N	NA	NA
B	16/11/2016	am	CH	7.974	unhulled	2.4	1	N	NA	NA
B	16/11/2016	am	CH	7.974	unhulled	2.71	2	Y	CH	GO
B	16/11/2016	am	CT	10	hulled	4.65	4	N	NA	NA
B	16/11/2016	am	CT	10	hulled	1	1	N	NA	NA
B	16/11/2016	am	CT	10	unhulled	0.31	0	Y	GO	CT
B	16/11/2016	am	CT	10	unhulled	0.23	0	Y	GO	CT
B	16/11/2016	am	GO	5.377	unhulled	109.85	51	N	NA	NA
B	16/11/2016	am	GO	5.377	unhulled	164.03	NA	Y	GO	CH
B	16/11/2016	am	GO	5.377	unhulled	29.5	NA	N	NA	NA
B	16/11/2016	am	GO	5.377	unhulled	174.31	NA	N	NA	NA
B	16/11/2016	am	GO	5.377	unhulled	171.84	NA	N	NA	NA
B	16/11/2016	am	GT	6.02	unhulled	7.5	3	N	NA	NA
B	16/11/2016	am	GT	6.02	unhulled	1.97	1	N	NA	NA
B	16/11/2016	am	GT	6.02	unhulled	1.66	1	N	NA	NA
B	16/11/2016	am	GT	6.02	unhulled	1.59	1	N	NA	NA
B	16/11/2016	am	GT	6.02	unhulled	1.59	1	N	NA	NA
B	16/11/2016	am	GT	6.02	unhulled	1.56	1	Y	CH	GT
B	16/11/2016	am	GT	6.02	unhulled	1.53	1	N	NA	NA
B	16/11/2016	am	GT	6.02	unhulled	4.37	3	N	NA	NA
B	16/11/2016	am	GT	6.02	unhulled	1.41	1	N	NA	NA
B	16/11/2016	am	GT	6.02	unhulled	2.72	2	N	NA	NA
B	16/11/2016	am	GT	6.02	unhulled	4.07	3	N	NA	NA
B	16/11/2016	am	GT	6.02	unhulled	1.31	1	N	NA	NA
B	16/11/2016	am	GT	6.02	unhulled	1.31	1	N	NA	NA
B	16/11/2016	am	GT	6.02	unhulled	1.31	1	N	NA	NA
B	16/11/2016	am	GT	6.02	unhulled	3.84	3	N	NA	NA
B	16/11/2016	am	GT	6.02	unhulled	1.22	1	N	NA	NA
B	16/11/2016	am	GT	6.02	unhulled	1.21	1	N	NA	NA
B	16/11/2016	am	GT	6.02	unhulled	2.29	2	N	NA	NA
B	16/11/2016	am	GT	6.02	unhulled	2.06	2	N	NA	NA
B	16/11/2016	am	GT	6.02	unhulled	1.03	1	N	NA	NA
B	16/11/2016	am	GT	6.02	unhulled	0.97	1	N	NA	NA
B	16/11/2016	am	GT	6.02	unhulled	2.87	3	N	NA	NA
B	16/11/2016	am	GT	6.02	unhulled	2.25	3	N	NA	NA
B	16/11/2016	am	GT	6.02	unhulled	4.41	6	N	NA	NA
B	16/11/2016	am	GT	6.02	unhulled	0.69	1	N	NA	NA
B	16/11/2016	am	GT	6.02	unhulled	5.75	NA	N	NA	NA
B	16/11/2016	am	GT	6.02	unhulled	2.22	NA	N	NA	NA
B	16/11/2016	am	R.	3.942	unhulled	0.78	1	N	NA	NA
A	16/11/2016	pm	BT	8.997	unhulled	4	1	N	NA	NA
A	16/11/2016	pm	BT	8.997	unhulled	4.69	2	Y	CH	BT
A	16/11/2016	pm	BT	8.997	unhulled	2.16	1	N	NA	NA
A	16/11/2016	pm	BT	8.997	unhulled	6.28	4	N	NA	NA
A	16/11/2016	pm	BT	8.997	unhulled	3.56	3	N	NA	NA
A	16/11/2016	pm	BT	8.997	unhulled	1.14	1	N	NA	NA
A	16/11/2016	pm	BT	8.997	unhulled	5.07	5	N	NA	NA
A	16/11/2016	pm	BT	8.997	unhulled	1	1	N	NA	NA
A	16/11/2016	pm	BT	8.997	unhulled	3.97	4	N	NA	NA
A	16/11/2016	pm	BT	8.997	unhulled	0.99	1	Y	BT	CT
A	16/11/2016	pm	BT	8.997	unhulled	0.98	1	N	NA	NA
A	16/11/2016	pm	BT	8.997	unhulled	1.59	2	N	NA	NA
A	16/11/2016	pm	BT	8.997	unhulled	0.66	1	N	NA	NA
A	16/11/2016	pm	BT	8.997	unhulled	1.31	2	N	NA	NA
A	16/11/2016	pm	BT	8.997	unhulled	0.64	1	N	NA	NA
A	16/11/2016	pm	BT	8.997	unhulled	0.61	1	N	NA	NA
A	16/11/2016	pm	BT	8.997	unhulled	0.37	1	N	NA	NA
A	16/11/2016	pm	CH	7.974	unhulled	4.62	1	N	NA	NA
A	16/11/2016	pm	CH	7.974	unhulled	3.55	2	N	NA	NA
A	16/11/2016	pm	CH	7.974	unhulled	3.27	2	N	NA	NA
A	16/11/2016	pm	CH	7.974	unhulled	6.44	4	N	NA	NA
A	16/11/2016	pm	CH	7.974	unhulled	7.81	5	N	NA	NA
A	16/11/2016	pm	CH	7.974	unhulled	6.13	4	N	NA	NA
A	16/11/2016	pm	CH	7.974	unhulled	20.97	14	N	NA	NA
A	16/11/2016	pm	CH	7.974	unhulled	7.34	5	N	NA	NA
A	16/11/2016	pm	CH	7.974	unhulled	1.35	1	N	NA	NA
A	16/11/2016	pm	CH	7.974	unhulled	6.71	5	N	NA	NA
A	16/11/2016	pm	CH	7.974	unhulled	1.07	1	N	NA	NA
A	16/11/2016	pm	CH	7.974	unhulled	1.03	1	N	NA	NA
A	16/11/2016	pm	CH	7.974	unhulled	1.84	2	N	NA	NA
A	16/11/2016	pm	CH	7.974	unhulled	1.72	2	N	NA	NA
A	16/11/2016	pm	CH	7.974	unhulled	4.87	6	N	NA	NA
A	16/11/2016	pm	CH	7.974	unhulled	2.19	3	N	NA	NA
A	16/11/2016	pm	CH	7.974	unhulled	1.07	2	Y	CH	GO
A	16/11/2016	pm	CH	7.974	unhulled	1.53	3	N	NA	NA
A	16/11/2016	pm	CH	7.974	unhulled	0.6	2	N	NA	NA
A	16/11/2016	pm	CH	7.974	unhulled	0.16	1	N	NA	NA
A	16/11/2016	pm	CH	7.974	unhulled	NA	NA	N	NA	NA
A	16/11/2016	pm	CH	7.974	unhulled	7.09	NA	Y	GO	CH
A	16/11/2016	pm	CH	7.974	unhulled	6.56	NA	N	NA	NA
A	16/11/2016	pm	CH	7.974	unhulled	5.94	NA	N	NA	NA
A	16/11/2016	pm	CH	7.974	unhulled	4.5	NA	N	NA	NA
A	16/11/2016	pm	CH	7.974	unhulled	0.66	NA	N	NA	NA
A	16/11/2016	pm	CH	7.974	unhulled	17.75	NA	N	NA	NA
A	16/11/2016	pm	CT	10	unhulled	3.22	1	N	NA	NA
A	16/11/2016	pm	CT	10	unhulled	2.17	1	N	NA	NA
A	16/11/2016	pm	CT	10	unhulled	1.69	1	N	NA	NA
A	16/11/2016	pm	CT	10	unhulled	2.72	2	N	NA	NA
A	16/11/2016	pm	CT	10	unhulled	1.31	1	N	NA	NA
A	16/11/2016	pm	CT	10	unhulled	1.15	1	Y	BT	CT
A	16/11/2016	pm	CT	10	unhulled	2.24	2	N	NA	NA
A	16/11/2016	pm	CT	10	unhulled	4.34	4	N	NA	NA
A	16/11/2016	pm	CT	10	unhulled	1.07	1	N	NA	NA
A	16/11/2016	pm	CT	10	unhulled	1.03	1	N	NA	NA
A	16/11/2016	pm	CT	10	unhulled	1.03	1	N	NA	NA
A	16/11/2016	pm	CT	10	unhulled	0.93	1	N	NA	NA
A	16/11/2016	pm	CT	10	unhulled	0.72	1	N	NA	NA
A	16/11/2016	pm	CT	10	unhulled	0.66	1	N	NA	NA
A	16/11/2016	pm	D.	6.533	unhulled	10.31	NA	N	NA	NA
A	16/11/2016	pm	D.	6.533	unhulled	2.53	1	N	NA	NA
A	16/11/2016	pm	GO	5.377	unhulled	29.41	2	N	NA	NA
A	16/11/2016	pm	GO	5.377	unhulled	1.97	2	N	NA	NA
A	16/11/2016	pm	GO	5.377	unhulled	23.65	NA	N	NA	NA
A	16/11/2016	pm	GO	5.377	unhulled	45.85	NA	N	NA	NA
A	16/11/2016	pm	GO	5.377	unhulled	18.04	NA	N	NA	NA
A	16/11/2016	pm	GT	6.02	unhulled	2.55	1	N	NA	NA
A	16/11/2016	pm	GT	6.02	unhulled	2.06	1	N	NA	NA
A	16/11/2016	pm	GT	6.02	unhulled	1.78	1	N	NA	NA
A	16/11/2016	pm	GT	6.02	unhulled	3.34	2	N	NA	NA
A	16/11/2016	pm	GT	6.02	unhulled	1.47	1	N	NA	NA
A	16/11/2016	pm	GT	6.02	unhulled	1.34	1	N	NA	NA
A	16/11/2016	pm	HS	1.044	unhulled	18.75	NA	N	NA	NA
A	16/11/2016	pm	R.	3.942	unhulled	3.04	2	N	NA	NA
A	16/11/2016	pm	R.	3.942	unhulled	2.06	3	N	NA	NA
B	16/11/2016	pm	BT	8.997	unhulled	2.65	1	N	NA	NA
B	16/11/2016	pm	BT	8.997	unhulled	2.34	1	Y	GT	BT
B	16/11/2016	pm	BT	8.997	unhulled	3.97	2	N	NA	NA
B	16/11/2016	pm	BT	8.997	unhulled	1.97	1	Y	GT	BT
B	16/11/2016	pm	BT	8.997	unhulled	1.94	1	N	NA	NA
B	16/11/2016	pm	BT	8.997	unhulled	3.63	2	N	NA	NA
B	16/11/2016	pm	BT	8.997	unhulled	1.81	1	N	NA	NA
B	16/11/2016	pm	BT	8.997	unhulled	1.78	1	N	NA	NA
B	16/11/2016	pm	BT	8.997	unhulled	1.72	1	N	NA	NA
B	16/11/2016	pm	BT	8.997	unhulled	1.69	1	N	NA	NA
B	16/11/2016	pm	BT	8.997	unhulled	1.63	1	N	NA	NA
B	16/11/2016	pm	BT	8.997	unhulled	1.53	1	N	NA	NA
B	16/11/2016	pm	BT	8.997	unhulled	3	2	N	NA	NA
B	16/11/2016	pm	BT	8.997	unhulled	1.41	1	N	NA	NA
B	16/11/2016	pm	BT	8.997	unhulled	1.4	1	N	NA	NA
B	16/11/2016	pm	BT	8.997	unhulled	2.78	2	N	NA	NA
B	16/11/2016	pm	BT	8.997	unhulled	1.28	1	N	NA	NA
B	16/11/2016	pm	BT	8.997	unhulled	1.25	1	N	NA	NA
B	16/11/2016	pm	BT	8.997	unhulled	1.25	1	N	NA	NA
B	16/11/2016	pm	BT	8.997	unhulled	2.43	2	N	NA	NA
B	16/11/2016	pm	BT	8.997	unhulled	3.59	3	N	NA	NA
B	16/11/2016	pm	BT	8.997	unhulled	1.19	1	N	NA	NA
B	16/11/2016	pm	BT	8.997	unhulled	1.19	1	N	NA	NA
B	16/11/2016	pm	BT	8.997	unhulled	1.18	1	N	NA	NA
B	16/11/2016	pm	BT	8.997	unhulled	1.18	1	N	NA	NA
B	16/11/2016	pm	BT	8.997	unhulled	1.13	1	N	NA	NA
B	16/11/2016	pm	BT	8.997	unhulled	2.25	2	N	NA	NA
B	16/11/2016	pm	BT	8.997	unhulled	3.28	3	N	NA	NA
B	16/11/2016	pm	BT	8.997	unhulled	1.09	1	N	NA	NA
B	16/11/2016	pm	BT	8.997	unhulled	2.16	2	N	NA	NA
B	16/11/2016	pm	BT	8.997	unhulled	1.07	1	N	NA	NA
B	16/11/2016	pm	BT	8.997	unhulled	1.06	1	N	NA	NA
B	16/11/2016	pm	BT	8.997	unhulled	1.04	1	N	NA	NA
B	16/11/2016	pm	BT	8.997	unhulled	1.03	1	N	NA	NA
B	16/11/2016	pm	BT	8.997	unhulled	1.03	1	N	NA	NA
B	16/11/2016	pm	BT	8.997	unhulled	1.03	1	N	NA	NA
B	16/11/2016	pm	BT	8.997	unhulled	1	1	N	NA	NA
B	16/11/2016	pm	BT	8.997	unhulled	0.97	1	N	NA	NA
B	16/11/2016	pm	BT	8.997	unhulled	1.88	2	N	NA	NA
B	16/11/2016	pm	BT	8.997	unhulled	1.84	2	Y	GT	BT
B	16/11/2016	pm	BT	8.997	unhulled	0.9	1	N	NA	NA
B	16/11/2016	pm	BT	8.997	unhulled	1.78	2	N	NA	NA
B	16/11/2016	pm	BT	8.997	unhulled	1.75	2	N	NA	NA
B	16/11/2016	pm	BT	8.997	unhulled	1.72	2	N	NA	NA
B	16/11/2016	pm	BT	8.997	unhulled	1.69	2	N	NA	NA
B	16/11/2016	pm	BT	8.997	unhulled	0.82	1	N	NA	NA
B	16/11/2016	pm	BT	8.997	unhulled	0.78	1	N	NA	NA
B	16/11/2016	pm	BT	8.997	unhulled	0.78	1	N	NA	NA
B	16/11/2016	pm	BT	8.997	unhulled	1.34	2	N	NA	NA
B	16/11/2016	pm	BT	8.997	unhulled	0.63	1	N	NA	NA
B	16/11/2016	pm	BT	8.997	unhulled	0.63	1	N	NA	NA
B	16/11/2016	pm	BT	8.997	unhulled	1.19	2	N	NA	NA
B	16/11/2016	pm	BT	8.997	unhulled	0.43	1	N	NA	NA
B	16/11/2016	pm	BT	8.997	unhulled	0.72	2	N	NA	NA
B	16/11/2016	pm	BT	8.997	unhulled	0.96	NA	N	NA	NA
B	16/11/2016	pm	BT	8.997	unhulled	4.62	NA	Y	CH	BT
B	16/11/2016	pm	BT	8.997	unhulled	2.56	NA	Y	CH	BT
B	16/11/2016	pm	BT	8.997	unhulled	5.09	NA	N	NA	NA
B	16/11/2016	pm	BT	8.997	unhulled	2.28	NA	N	NA	NA
B	16/11/2016	pm	BT	8.997	unhulled	1.9	NA	N	NA	NA
B	16/11/2016	pm	BT	8.997	unhulled	1.85	NA	N	NA	NA
B	16/11/2016	pm	BT	8.997	unhulled	1.69	NA	N	NA	NA
B	16/11/2016	pm	BT	8.997	unhulled	1.12	NA	N	NA	NA
B	16/11/2016	pm	BT	8.997	unhulled	1.04	NA	N	NA	NA
B	16/11/2016	pm	BT	8.997	unhulled	1.63	NA	N	NA	NA
B	16/11/2016	pm	BT	8.997	unhulled	NA	NA	N	NA	NA
B	16/11/2016	pm	CH	7.974	unhulled	4.88	1	N	NA	NA
B	16/11/2016	pm	CH	7.974	unhulled	3.6	4	N	NA	NA
B	16/11/2016	pm	CH	7.974	unhulled	0.87	1	N	NA	NA
B	16/11/2016	pm	CH	7.974	unhulled	0.75	1	N	NA	NA
B	16/11/2016	pm	CH	7.974	unhulled	0.71	1	N	NA	NA
B	16/11/2016	pm	CH	7.974	unhulled	1.38	2	N	NA	NA
B	16/11/2016	pm	CH	7.974	unhulled	0.62	1	N	NA	NA
B	16/11/2016	pm	CH	7.974	unhulled	1.22	2	N	NA	NA
B	16/11/2016	pm	CH	7.974	unhulled	0.46	1	N	NA	NA
B	16/11/2016	pm	CH	7.974	unhulled	0.44	1	N	NA	NA
B	16/11/2016	pm	CH	7.974	unhulled	0.43	1	N	NA	NA
B	16/11/2016	pm	CH	7.974	unhulled	0.31	1	N	NA	NA
B	16/11/2016	pm	CH	7.974	unhulled	0.28	1	N	NA	NA
B	16/11/2016	pm	CH	7.974	unhulled	8.81	NA	N	NA	NA
B	16/11/2016	pm	CH	7.974	unhulled	6.88	NA	N	NA	NA
B	16/11/2016	pm	CH	7.974	unhulled	1.69	NA	N	NA	NA
B	16/11/2016	pm	CH	7.974	unhulled	11.66	NA	N	NA	NA
B	16/11/2016	pm	CT	10	unhulled	1.28	1	N	NA	NA
B	16/11/2016	pm	CT	10	unhulled	1.27	1	N	NA	NA
B	16/11/2016	pm	CT	10	unhulled	1.16	1	N	NA	NA
B	16/11/2016	pm	CT	10	unhulled	2.43	3	N	NA	NA
B	16/11/2016	pm	GO	5.377	unhulled	72.68	28	N	NA	NA
B	16/11/2016	pm	GO	5.377	unhulled	41.9	17	N	NA	NA
B	16/11/2016	pm	GO	5.377	unhulled	0.81	1	Y	CH	GO
B	16/11/2016	pm	GO	5.377	unhulled	3.97	NA	Y	CH	GO
B	16/11/2016	pm	GO	5.377	unhulled	58.62	NA	N	NA	NA
B	16/11/2016	pm	GT	6.02	hulled	1.65	1	N	NA	NA
B	16/11/2016	pm	GT	6.02	unhulled	8.82	1	N	NA	NA
B	16/11/2016	pm	GT	6.02	unhulled	2.66	1	N	NA	NA
B	16/11/2016	pm	GT	6.02	unhulled	4.87	2	N	NA	NA
B	16/11/2016	pm	GT	6.02	unhulled	4.45	2	N	NA	NA
B	16/11/2016	pm	GT	6.02	unhulled	2	1	N	NA	NA
B	16/11/2016	pm	GT	6.02	unhulled	3.66	2	N	NA	NA
B	16/11/2016	pm	GT	6.02	unhulled	1.75	1	N	NA	NA
B	16/11/2016	pm	GT	6.02	unhulled	5.22	3	N	NA	NA
B	16/11/2016	pm	GT	6.02	unhulled	5.1	3	N	NA	NA
B	16/11/2016	pm	GT	6.02	unhulled	1.66	1	N	NA	NA
B	16/11/2016	pm	GT	6.02	unhulled	1.66	1	N	NA	NA
B	16/11/2016	pm	GT	6.02	unhulled	1.65	1	N	NA	NA
B	16/11/2016	pm	GT	6.02	unhulled	1.56	1	N	NA	NA
B	16/11/2016	pm	GT	6.02	unhulled	1.56	1	N	NA	NA
B	16/11/2016	pm	GT	6.02	unhulled	3.06	2	N	NA	NA
B	16/11/2016	pm	GT	6.02	unhulled	1.53	1	N	NA	NA
B	16/11/2016	pm	GT	6.02	unhulled	1.41	1	N	NA	NA
B	16/11/2016	pm	GT	6.02	unhulled	1.41	1	N	NA	NA
B	16/11/2016	pm	GT	6.02	unhulled	1.38	1	N	NA	NA
B	16/11/2016	pm	GT	6.02	unhulled	1.37	1	N	NA	NA
B	16/11/2016	pm	GT	6.02	unhulled	4.1	3	N	NA	NA
B	16/11/2016	pm	GT	6.02	unhulled	1.35	1	N	NA	NA
B	16/11/2016	pm	GT	6.02	unhulled	2.69	2	N	NA	NA
B	16/11/2016	pm	GT	6.02	unhulled	2.69	2	N	NA	NA
B	16/11/2016	pm	GT	6.02	unhulled	1.34	1	N	NA	NA
B	16/11/2016	pm	GT	6.02	unhulled	1.32	1	N	NA	NA
B	16/11/2016	pm	GT	6.02	unhulled	1.31	1	N	NA	NA
B	16/11/2016	pm	GT	6.02	unhulled	1.31	1	N	NA	NA
B	16/11/2016	pm	GT	6.02	unhulled	1.31	1	N	NA	NA
B	16/11/2016	pm	GT	6.02	unhulled	1.29	1	N	NA	NA
B	16/11/2016	pm	GT	6.02	unhulled	1.28	1	N	NA	NA
B	16/11/2016	pm	GT	6.02	unhulled	2.54	2	N	NA	NA
B	16/11/2016	pm	GT	6.02	unhulled	3.81	3	N	NA	NA
B	16/11/2016	pm	GT	6.02	unhulled	3.81	3	N	NA	NA
B	16/11/2016	pm	GT	6.02	unhulled	1.25	1	N	NA	NA
B	16/11/2016	pm	GT	6.02	unhulled	1.19	1	N	NA	NA
B	16/11/2016	pm	GT	6.02	unhulled	1.19	1	N	NA	NA
B	16/11/2016	pm	GT	6.02	unhulled	1.19	1	N	NA	NA
B	16/11/2016	pm	GT	6.02	unhulled	1.19	1	N	NA	NA
B	16/11/2016	pm	GT	6.02	unhulled	3.53	3	N	NA	NA
B	16/11/2016	pm	GT	6.02	unhulled	2.35	2	N	NA	NA
B	16/11/2016	pm	GT	6.02	unhulled	1.17	1	N	NA	NA
B	16/11/2016	pm	GT	6.02	unhulled	1.16	1	N	NA	NA
B	16/11/2016	pm	GT	6.02	unhulled	1.15	1	N	NA	NA
B	16/11/2016	pm	GT	6.02	unhulled	1.13	1	N	NA	NA
B	16/11/2016	pm	GT	6.02	unhulled	1.13	1	N	NA	NA
B	16/11/2016	pm	GT	6.02	unhulled	1.13	1	N	NA	NA
B	16/11/2016	pm	GT	6.02	unhulled	1.13	1	N	NA	NA
B	16/11/2016	pm	GT	6.02	unhulled	2.25	2	N	NA	NA
B	16/11/2016	pm	GT	6.02	unhulled	3.28	3	N	NA	NA
B	16/11/2016	pm	GT	6.02	unhulled	1.06	1	N	NA	NA
B	16/11/2016	pm	GT	6.02	unhulled	1.06	1	N	NA	NA
B	16/11/2016	pm	GT	6.02	unhulled	2.09	2	N	NA	NA
B	16/11/2016	pm	GT	6.02	unhulled	1.04	1	N	NA	NA
B	16/11/2016	pm	GT	6.02	unhulled	2.07	2	N	NA	NA
B	16/11/2016	pm	GT	6.02	unhulled	2.07	2	N	NA	NA
B	16/11/2016	pm	GT	6.02	unhulled	2.06	2	N	NA	NA
B	16/11/2016	pm	GT	6.02	unhulled	1.03	1	N	NA	NA
B	16/11/2016	pm	GT	6.02	unhulled	1	1	N	NA	NA
B	16/11/2016	pm	GT	6.02	unhulled	1	1	N	NA	NA
B	16/11/2016	pm	GT	6.02	unhulled	2.97	3	N	NA	NA
B	16/11/2016	pm	GT	6.02	unhulled	7.91	8	N	NA	NA
B	16/11/2016	pm	GT	6.02	unhulled	2.85	3	N	NA	NA
B	16/11/2016	pm	GT	6.02	unhulled	0.94	1	N	NA	NA
B	16/11/2016	pm	GT	6.02	unhulled	2.79	3	N	NA	NA
B	16/11/2016	pm	GT	6.02	unhulled	4.63	5	N	NA	NA
B	16/11/2016	pm	GT	6.02	unhulled	2.69	3	N	NA	NA
B	16/11/2016	pm	GT	6.02	unhulled	2.66	3	N	NA	NA
B	16/11/2016	pm	GT	6.02	unhulled	0.88	1	Y	GT	BT
B	16/11/2016	pm	GT	6.02	unhulled	0.88	1	N	NA	NA
[truncated: 4,739 more rows]
